# Supplementary material for: Characterization of smoke/dust episode over West Africa: comparison of MERRA-2 modeling with multiwavelength Mie-Raman lidar observations
Source: Copernicus journal article supplement (doi:10.5194/amt-2017-342), 2017-10-05
Supplement: Supplementary file [file amt-2017-342-RC1-supplement.pdf]

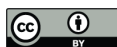

1 **Characterization of smoke/dust episode over West Africa: comparison of MERRA-2**  
2 **modeling with multiwavelength Mie-Raman lidar observations**

3 Igor Veselovskii<sup>1,2,3</sup>, Philippe Goloub<sup>4</sup>, Thierry Podvin<sup>4</sup>, Didier Tanre<sup>4</sup>, Arlindo da Silva<sup>3</sup>, Peter  
4 Colarco<sup>3</sup>, Patricia Castellanos<sup>3,5</sup>, Mikhail Korenskiy<sup>1</sup>, Qiaoyun Hu<sup>3</sup>, David N. Whiteman<sup>4</sup>, Daniel  
5 Pérez-Ramírez<sup>6</sup>, Patrick Augustin<sup>7</sup>, Marc Fourmentin<sup>7</sup>, Alexei Kolgotin<sup>1</sup>

6 <sup>1</sup>*Physics Instrumentation Center of GPI, Troitsk, Moscow, Russia.*

7 <sup>2</sup>*Joint Center for Earth Systems Technology, UMBC, Baltimore, USA*

8 <sup>3</sup>*NASA Goddard Space Flight Center, Greenbelt, USA*

9 <sup>4</sup>*Laboratoire d'Optique Atmosphérique, Université de Lille-CNRS, Villeneuve d'Ascq, France*

10 <sup>5</sup>*Universities Space Research Association, Columbia, Maryland, USA*

11 <sup>6</sup>*Applied Physics Department, University of Granada, Spain*

12 <sup>7</sup>*Laboratoire de Physico-chimie de l'atmosphère, Université du littoral côte d'Opale, France*

13

14 **Abstract**

15 Observations of multiwavelength Mie-Raman lidar taken during the SHADOW field  
16 campaign are used to analyze a smoke/dust episode over West Africa on 24-27 December 2015.  
17 For the case considered, the dust layer extended from the ground up to approximately 2000 m  
18 while the elevated smoke layer occurred in the 2500 m – 4000 m range. The profiles of lidar  
19 measured backscattering, extinction coefficients and depolarization ratios are compared with the  
20 vertical distribution of aerosol parameters provided by the Modern-Era Retrospective analysis  
21 for Research and Applications, Version 2 (MERRA-2). The MERRA-2 model simulated the  
22 correct location of the near-surface dust and elevated smoke layers. The values of modeled and  
23 observed **extinctions** at both 355 nm and 532 nm are also rather close. Good coherence between  
24 measured and modeled extinction profiles provides an opportunity to test how well the model  
25 reproduces backscattering of dust particles at different wavelengths. The comparison shows good  
26 agreement of modeled and measured backscattering coefficients at 355 nm, meaning that the  
27 modeled dust lidar ratio of 65 sr in the near-surface layer is close to the observed **value** at 532  
28 nm however, the simulated lidar ratio is lower than measurements (about **40 sr and 50 sr**  
29 respectively). The reason for this disagreement could be that the assumed imaginary part of the  
30 refractive index for dust (0.0025 at 532 nm) is too low, or that the particle size distribution in the  
31 model is too much weighted toward fine mode dust. The model predicts significant concentration



1 of dust particles inside the smoke layer. This is supported by a **high** depolarization ratio of 15%  
2 observed in the center of this layer. The backscattering Ångström exponent at 355/532 nm as  
3 well as both lidar ratios have a minimum in the center of the elevated layer, which can also be  
4 explained by the presence of dust.

5

6

## 7 **1. Introduction**

8 Atmospheric aerosols are an important factor influencing the Earth's radiative budget,  
9 though its impact is still highly uncertain due largely to the complicated mechanisms of aerosol –  
10 cloud interaction. In particular, the processes in the aerosol – cloud ecosystem are strongly  
11 influenced by the height distribution of different aerosol components, thus the knowledge of  
12 these height distributions is essential to decrease the uncertainty of aerosol radiative forcing  
13 estimates. Lidar is a recognized instrument for vertical profiling of aerosol properties, and the  
14 possibility to invert lidar observations at several wavelengths to aerosol microphysical properties  
15 has been extensively studied both theoretically and experimentally over the two past decades  
16 (e.g. Müller et al., 1999; 2016; Veselovskii et al., 2002; Böckman et al., 2005). These studies  
17 revealed the importance of using Raman or HSRL (high spectral resolution lidar) systems, which  
18 allow independent measurements of aerosol extinction and backscattering coefficients to be  
19 made. At present, the most practical configuration of Raman (HSRL) lidar is based on a **triple**  
20 Nd:YAG laser. Such a lidar provides the so called  $3\beta+2\alpha$  set of observations, including three  
21 backscattering (355 nm, 532 nm, 1064 nm) and two extinction (355 nm, 532 nm) coefficients.

22 However the problem of inversion of  $3\beta+2\alpha$  observations is **underdetermined**. As a result,  
23 instead of a unique solution, a family of solutions should be considered, leading to an increase in  
24 retrieval uncertainties. Still the estimation of volume density ( $V$ ) and effective radius ( $r_{\text{eff}}$ ) with  
25 uncertainty below 30% is possible, especially when the fine mode in the particle size distribution  
26 (PSD) is predominant (e.g. Veselovskii et al., 2004; Müller et al., 2005; 2016; Pérez-Ramírez et  
27 al., 2013, ). The refractive index (RI) can be also estimated from the measurements, although the  
28 uncertainty of such estimation is significant: for the real part ( $m_R$ ) of RI the uncertainty is  
29 normally about  $\pm 0.05$  and for the imaginary part ( $m_I$ ) it is about 50% when  $m_I > 0.01$ .  
30 (Veselovskii et al., 2004; Müller et al., 2016). Proposed improvements of inversion schemes  
31 were considered in recent publications (Chemyakin et al., 2014; Kolgotin et al., 2016), still these



1 improvements  don't resolve the fundamental issue: the information content of  $3\beta+2\alpha$   
2 observations is insufficient to support exact solution of the problem and additional information  
3 should be used in retrievals to improve the accuracy of the retrieved products (Veselovskii et al.,  
4 2005; Burton et al., 2016; Kahnert and Andersson, 2017; Alexandrov and  Mishchenko 7).

5 We should recall also that in the inversion schemes considered, the refractive index is  
6 normally assumed to be spectrally and size independent, which is generally not the case in the  
7 atmosphere. Moreover, the volume density and effective radius obtained from  $3\beta+2\alpha$   
8 observations are attributed to the whole size distribution, which is of limited practical use,  
9 because of the importance of characterizing the particle properties separately for the fine and  
10 coarse modes. Considering these issues makes the inverse problem even more underdetermined,  
11 emphasizing the need for additional input information.

12 One opportunity to get this additional information is  combining the lidar observations  
13 with aerosol transport models (Kahnert and Andersson, 2017). Models provide the vertical  
14 distribution of mass mixing ratios of chemical aerosol components, which can be used as “initial  
15 guess” in the inversion scheme. MERRA-2 offers a unique opportunity to provide such an  
16 “initial guesses” of the vertical structure of aerosol chemical composition. MERRA-2 is  
17 produced with NASA’s global Earth system model, GEOS-5 (Goddard Earth Observing System  
18 version 5) (Gelaro et al 2017) and includes an online coupling with the Goddard Chemistry,  
19 Aerosol, Radiation and Transport model (GOCART), which allows for assimilation of aerosol  
20 optical depth (AOD) from space borne and surface instruments such as MODIS, AVHRR,  
21 MISR, and AERONET (Randles et al. 2017). The fundamental data that MERRA-2 provides are  
22 vertical profiles of the mass mixing ratios of five aerosol components: dust, sea salt, black and  
23 organic carbon, and sulfate aerosols. The main optical parameters related to lidar measurements,  
24 such as aerosol extinction and backscattering coefficients can be calculated basing on these data.  
25 The principal question arising, however, is how well the reanalysis reproduces independent  
26 observations, and thus can provide a realistic initial guess for a lidar inversion scheme. Buchard  
27 et al. (2017) and Randles et al (2017) extensively validated MERRA-2 with independent surface  
28 and aircraft observations of particulate matter (PM<sub>2.5</sub>) and AOD, as well as space-based  
29 observations of absorption aerosol optical depth and aerosol index, finding generally good  
30 agreement between the observations and MERRA-2.



1 For global validation of the aerosol vertical distribution, the modeled profiles of  
2 attenuated backscatter were compared to spaceborne Cloud–Aerosol Lidar with Orthogonal  
3 Polarization (CALIOP) observations (Winker et al., 2009), and a good consistency between  
4 simulations and observations was reported (Nowottnick et al., 2015, Buchard et al., 2017).  
5 However, the utility of CALIOP observations for accurate evaluation of aerosol vertical  
6 distributions is limited as only elastic backscatter is analyzed and the signal to noise ratio of  
7 space borne measurements is low. More opportunities for model validation are provided by  
8 ground based multiwavelength Raman or HSRL systems. Such lidars by their nature have limited  
9 spatial coverage but are better suited for characterization of the vertical distribution of particle  
10 properties at a chosen location.

11 In our paper, we consider Raman lidar observations taken during a smoke/dust episode  
12 over West Africa in December 2015 during the SHADOW campaign (Veselovskii et al., 2016),  
13 and compare the vertical profiles of particle parameters with MERRA-2. The simultaneous  
14 presence of dust and smoke layers in the atmosphere provides an opportunity to test the ability of  
15 the model to reproduce the vertical structure of aerosol properties over the observation site.

16

## 17 **2. Measurement setup and data analysis**

### 18 **2.1 Observation site**

19 The observation site is located at the Institute for Research and Development (IRD)  
20 Center, Mbour, Senegal (14<sup>0</sup>N, 17<sup>0</sup>W). Information about the SHADOW (study of SaHAran  
21 Dust Over West Africa) campaign and instruments at the IRD site can be found in the recent  
22 publication by Veselovskii et al. (2016). During the SHADOW campaign data from three lidar  
23 instruments were available:

24 • Cimel CE-370 micropulse lidar ([www.cimel.fr](http://www.cimel.fr)) operated 24 hours per day at 532 nm  
25 allowing real-time monitoring of aerosol and cloud layers.

26 • Doppler lidar Windcube WLS 100 ([www.leosphere.com](http://www.leosphere.com)) provided continuous  
27 monitoring of the wind field in the range from 100 m to 5 km with 50 m range resolution.

28 • Multiwavelength Mie - Raman polarization lidar LILAS (Lille Lidar AtmosphereS),  
29 allowed simultaneous detection of elastic and Raman backscatter signals and thus provides  
30  $3\beta+2\alpha$  observations along with depolarization ratio at 532 nm.



1 LILAS measurements were performed from inside a laboratory building through a  
 2 window at an angle of 47 deg with respect to the horizon. Acquiring Raman backscatter at 408  
 3 nm also permits profiling of the water vapor mixing ratio (WVMR) (Whiteman et al., 1992). For  
 4 calibration of the water vapor channel, radiosonde launches from Dakar (about 70 km away from  
 5 Mbour) were used. The large separation between the lidar and radiosonde locations prevented an  
 6 accurate calibration, so the WVMR data were used mainly to monitor the relative change of the  
 7 water vapor content. The temporal resolution of the measurements was approximately 3 minutes.  
 8 The backscattering coefficients and depolarization ratio were calculated with range resolution 7.5  
 9 m (with corresponding height resolution of 5.5 m). Resolution of extinction coefficient  
 10 measurements varied with height from 50 m (at 1000 m) to 125 m (at 7000 m).

11 Particle extinction ( $\alpha$ ) and backscattering ( $\beta$ ) coefficients at 355 nm and 532 nm are  
 12 calculated from elastic and Raman backscatter signals, as described in Ansmann et al. (1992).  
 13 Backscattering coefficients at 1064 nm were calculated by the Klett method (Klett, 1981).

14 In the data analysis both volume ( $\delta^v$ ) and particle ( $\delta$ ) depolarization ratios are considered.  
 15 These ratios are defined as

$$16 \quad \delta^v = \frac{\beta_{\perp}^p + \beta_{\perp}^m}{\beta_{\parallel}^p + \beta_{\parallel}^m} = C \frac{P_{\perp}}{P_{\parallel}} \quad (1)$$

$$17 \quad \delta = \frac{\beta_{\perp}^p}{\beta_{\parallel}^p} \quad (2)$$

18 Here P is the power of the elastic backscatter signal. Superscripts “p” and “m” indicate particle  
 19 and molecule backscattering, while subscripts “ $\perp$ ” and “ $\parallel$ ” indicate cross- and co-polarized  
 20 components, C is the calibration constant. Particle depolarization is calculated as suggested by  
 21 (Freudenthaler et al., 2009):

$$22 \quad \delta = \frac{(1 + \delta^m) \delta^v R - (1 + \delta^v) \delta^m}{(1 + \delta^m) R - (1 + \delta^v)} \quad (3)$$

23 here  $\delta^m$  is the molecular depolarization ratio and R is the aerosol scattering ratio:

$$24 \quad R = \frac{\beta^p + \beta^m}{\beta^m} \quad (4)$$

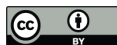

1 For further convenience we will use notations  $\beta = \beta_{\text{H}}^p + \beta_{\text{I}}^p$ , and  $\alpha = \alpha^p$ . To characterize the  
2 spectral dependence of  $\beta$  and  $\alpha$ , the backscattering and extinction Ångström exponents (BAE and  
3 EAE) for wavelengths  $\lambda_1$  and  $\lambda_2$  are calculated as:

$$4 \quad A^\beta = -\frac{\ln\left(\frac{\beta_{\lambda_1}}{\beta_{\lambda_2}}\right)}{\ln\left(\frac{\lambda_2}{\lambda_1}\right)}, \quad A^\alpha = -\frac{\ln\left(\frac{\alpha_{\lambda_1}}{\alpha_{\lambda_2}}\right)}{\ln\left(\frac{\lambda_2}{\lambda_1}\right)} \quad (5)$$

5

## 6 **2.2 MERRA-2 aerosol reanalysis**

7 The MERRA-2 simulations of aerosol properties over the observation site were made  
8 using the GOCART model (Chin et al. 2002) integrated within GEOS-5. The model includes  
9 representations of dust, sea salt, black and organic carbon, and sulfate aerosols. The aerosol  
10 components are assumed to be externally mixed. The optical properties of these aerosol  
11 components are summarized in Appendix 1. Sulfate and carbonaceous aerosols are both assumed  
12 to be in the fine mode. Sea salt and dust are both represented by five size bins spanning 0.1 – 10  
13 microns radius for dust and 0.03 – 10 microns dry radius for sea salt, allowing for simulation of  
14 both the fine and coarse fractions of each. A more complete description of how GOCART is  
15 implemented in GEOS-5 is provided in Colarco et al. (2010), which also includes a detailed  
16 evaluation of the model with respect to MODIS, MISR, and AERONET aerosol optical depth  
17 observations.

18 **Optical properties of the aerosols** are primarily based on Mie calculations using the  
19 particle properties as in Colarco et al. (2010) and Chin et al. (2002), with spectral refractive  
20 indices from the Optical Properties of Aerosols and Clouds (OPAC, Hess et al. 1998) database.  
21 However, for dust, non-spherical optical properties derived from an offline database are used  
22 (Colarco et al. 2014). For sea salt, sulfate, and the hydrophilic portion of carbonaceous aerosol,  
23 hygroscopic growth is considered following Chin et al. (2002), with growth factors from OPAC  
24 **and Gerber** (1985). The refractive index for organic carbon is based on the 100% brown carbon  
25 case from Hammer et al. (2016) and it is implemented as described in Colarco et al. (2017).

26 **Sources** of aerosols in the model include wind-speed based emissions of dust and sea salt,  
27 fossil fuel combustion, biomass burning, biofuel consumption, biogenic particulate organic  
28 matter, and oxidation of di-methyl sulfide (DMS) and SO<sub>2</sub>, which includes volcanic sources.

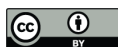

1 Aerosol sinks include convective scavenging, dry deposition, and wet removal, where aerosol  
2 hygroscopic growth is considered in the calculation of particle fall velocity and deposition  
3 velocity. The model resolution is  $0.5^\circ \times 0.625^\circ$  latitude by longitude with 72 hybrid-eta layers  
4 from the surface to 0.01 hPa. Additional details of the simulation can be found in Randles et al.  
5 (2017) and Buchard et al. (2017).

6 In MERRA-2, aerosol and meteorological observations are jointly assimilated within  
7 GEOS-5. Aerosols are assimilated by means of analysis splitting and the local displacement  
8 ensemble (LDE) methodology (Buchard et al. 2015, 2016). The system assimilated MODIS,  
9 AVHRR, MISR, and AERONET 550 nm AOD. AERONET measurements are interpolated to  
10 550 nm using the Angström relationship and the closest available channels, generally 500 and  
11 675 nm. The assimilation determines an AOD increment, which corrects the model AOD in a  
12 way that minimizes the differences between the model and observations. The AOD increment  
13 both corrects for misplaced aerosol plumes, and scales the aerosol mass mixing ratio to match the  
14 observations. The 2D AOD increment does not contain enough information to correct either the  
15 vertical distribution of aerosols or the aerosol composition. Thus, the model determines the  
16 aerosol speciation, optical properties, and vertical distributions, while the AOD increments  
17 modulate the aerosol mass. Thus, the assimilated aerosol distributions and physical and optical  
18 properties arise from the forecast model assumptions and the formulation of the aerosol data  
19 assimilation algorithm.

20

### 21 3. Results of the measurements

22 The smoke layers from forest fires near the equator were regularly observed over the  
23 instrumentation site during the wintertime measurement sessions made in December 2015 –  
24 January 2016. In our study we will focus on a strong smoke episode that occurred on 24-27  
25 December 2015. The back trajectories for the air mass over Mbour on 25 December 2015 at  
26 04:00 UTC are shown in [fig. 1](#)   [together with map of fires on 20 December 2015](https://worldview.earthdata.nasa.gov)  
27 [\(<https://worldview.earthdata.nasa.gov>\)](https://worldview.earthdata.nasa.gov).

28 The air masses below 1500 m (red and blue lines) are transported over the desert and are  
29 strongly loaded by dust, while air masses at 3000 m (green line) arrive from the South and pass  
30 over the regions of forest fires, and thus can transport smoke particles. The Cimel MPL operated  
31 continuously through the period of 24-27 December and thus monitored the arrival and evolution



1 of the smoke layer, as shown in [fig. 1](#). An elevated smoke layer appears on 24 December around  
2 00:00 UTC. The [layer](#) becomes thicker during the day but remains confined to the height interval  
3 of 2.5 km– 4.0 km and stays well separated from the dust layer, which extends from the ground  
4 to approximately 2.0 km. Such structure of the layers is preserved throughout 25 December, as  
5 well.

6 Cirrus clouds appear at 08:00 UTC on 24 December at a height of 8 km, soon after the  
7 smoke layer arrival ([fig. 2](#)) and persist throughout the smoke episode. After 12:00 UTC on 24  
8 December the clouds start descending and by [7](#) UTC on 25 December the cloud base is below  
9 6 km ([fig. 2](#)). On 26 December strong precipitation of ice particles occurs ([fig. 2c](#)) and finally, on  
10 27 December the cloud is located at the top of the smoke-dust layer ([fig. 2d](#)).

11 Multiwavelength Raman lidar observations are available for the 23-25 December period  
12 only. The height – temporal evolution of the backscattering coefficient  $\beta_{532}$ , depolarization  
13 ratio  $\delta_{532}$  and water vapor mixing ratio  $w$  measured by Raman lidar on the nights 23-24 and 24-  
14 25 December 2015 are shown in [fig. 3](#). Due to the geometrical overlap factor the extinction data  
15 can be processed starting from approximately 750 m, thus plots of all parameters start at this  
16 height. The depolarization ratios of pure dust observed during SHADOW are in the 30-35%  
17 range ([Veselovskii et al., 2016](#)), the depolarization ratio of smoke at 532 nm normally is  
18 below 10% (e.g. Tesche et al., 2011, Burton et al., 2015). Hence depolarization measurements  
19 provide a convenient way to separate the aerosols into dust and smoke components. On the  
20 of 23-24 December the dust layer extends up to 2500 m, but high depolarization ratio (>30%),  
21 which is usually associated with pure dust, is observed only below 1000 m, meaning that in 1000  
22 m – 2500 m range the dust is probably mixed with smoke. The optical depth of the elevated  
23 smoke layer is rather small on 23-24 December (0.1 at 5:00 UTC), but on 24-25 December it  
24 increases up to 0.25 making possible the calculation of extinction coefficients from the Raman  
25 lidar signals. For analyzing the vertical distribution of smoke and dust particle parameters, we  
26 focus on the nighttime measurements of 24-25 December 2015.

27 [Fig. 4](#) shows horizontal wind direction and speed measured by the wind lidar on 24-25  
28 December. The range corrected signal of the wind lidar can be evaluated starting from 100 m  
29 height, and the corresponding height – temporal image is shown in [fig. 5](#). The wind speed was  
30 measured in the dust layer (< 1500 m) for the whole period, however inside the smoke layer the  
31 backscatter signal is lower, so the measurements were possible only in the period of 16:00-22:00





1 UTC on 24 December. During 24-25 December 2015, the wind in the low troposphere (<1500  
2 m) is mainly dominated by the easterly Harmattan continental trades. Deceleration and  
3 acceleration of the lower part of the Harmattan (<1000 m) are observed, respectively in the  
4 beginning of the afternoon and during the night. The vertical profile of the wind speed  
5 demonstrates the presence of a Low Level Jet (LLJ) where the maximum wind speed (Jet speed)  
6 is located at a height of 350 m (LLJ height) at 1:00 UTC. LLJs are known to contribute to  
7 regional horizontal aerosol transport and to increase vertical mixing. Indeed, the LLJ occurrence  
8 at 1:00 UTC increases the aerosol loading by transporting desert dust. The corresponding  
9 increase of backscattering due to the LLJ at 1:00 UTC on 25 December can also be seen in [fig. 5](#)  
10 [Vertical](#) profiles of temperature  $T$ , potential temperature  $\Theta$ , wind direction and speed  
11 together with relative humidity RH and water vapor mixing ratio (WVMR) from radiosonde  
12 launched from Dakar at 00:00 UTC on 25 December 2015 are shown in [fig. 6](#). The profile of  
13 wind speed and wind direction obtained from the sonde confirms that the LLJ observed with  
14 lidar at Mbour is not a local phenomenon, because it is also observed at Dakar. The vertical  
15 profile of potential temperature suggests that the Nocturnal Boundary Layer (NBL) top  
16 corresponds to the LLJ height. Above 3000 m, the lidar and sonde depict southerly winds which  
17 transport the smoke plume. [Water](#) vapor mixing ratio increases above 2500 m; as a result the RH  
18 in the smoke layer reaches 75% while in the dust layer RH is below 30%.

19 To quantify the vertical distribution of particle parameters, [fig. 7](#) shows profiles of  
20 backscattering ( $\beta_{355}$ ,  $\beta_{532}$ ,  $\beta_{1064}$ ) and extinction ( $\alpha_{355}$ ,  $\alpha_{532}$ ) coefficients derived from Raman lidar  
21 measurements for three temporal intervals on the night of 24-25 December: 19:00-23:00 UTC,  
22 1:00-4:00 UTC and 4:00-7:00 UTC. The particle depolarization ratios  $\delta_{532}$  for the same intervals  
23 together with the water vapor mixing ratio  $w$  are shown in [fig. 8](#), while extinction and  
24 backscattering Ångström exponents  $A_{355/532}^{\alpha}$ ,  $A_{355/532}^{\beta}$ ,  $A_{532/1064}^{\beta}$  are given by [fig. 9](#). For the first  
25 temporal interval ([fig. 7a](#)) dust and smoke layers are well separated. Extinction coefficients  $\alpha_{355}$   
26 and  $\alpha_{532}$  differ in the smoke layer ( $\alpha_{355} > \alpha_{532}$ ), but inside the near-surface dust layer (below 1750  
27 m) the extinction values are nearly the same. The depolarization ratio is  $\delta_{532} = 35 \pm 5\%$  at 750 m  
28 and it gradually decreases with height to  $27 \pm 4\%$  at 1750 m. Above that height  $\delta_{532}$  decreases  
29 quickly, indicating an increase in the contribution of smoke particles. For the second and third  
30 temporal intervals the dust and smoke layers appear to mix leading to layering in the

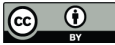

1 backscattering coefficient in the 1000 m – 2000 m range. The EAE in this range is increased up  
2 to 0.5 (fig.9c) indicating that these layers may contain significant amounts of smoke.

3 The EAE of pure dust observed during SHADOW is slightly negative  $A_{355/532}^{\alpha} \approx -0.1$   
4 (Veselovskii et al., 2016). In (fig.9a) the EAE below 1500 m is about  $0.2 \pm 0.2$ , so the dust likely  
5 contains some amount of smoke. Values of EAE close to zero are observed in (fig.9b) below  
6 1000, where the depolarization ratio increases up to  $35 \pm 5\%$ . Inside the dust layer  $\beta_{355} < \beta_{532}$ , so  
7 the corresponding backscattering Ångström exponent is negative. The negative values of  $A_{355/532}^{\beta}$   
8 have been already reported by Veselovskii et al., (2016), where negative BAE was attributed to  
9 an increase of the imaginary part of the complex refractive index at 355 nm compared to 532 nm.  
10 In the center of the elevated layer at 3100 m  $\delta_{532} = 14 \pm 3\%$ , while at the top of this layer  $\delta_{532}$   
11 decreases to  $6 \pm 1.5\%$  (fig.8a), indicating a possible presence of dust particles in the center of  
12 elevated layer. The loading of elevated layer with dust particles is supported also by the profiles  
13 of  $A_{355/532}^{\beta}$ : for all three temporal intervals  $A_{355/532}^{\beta}$  demonstrates the dip in the center of elevated  
14 layer, while  $A_{355/532}^{\alpha}$  and  $A_{532/1064}^{\beta}$  do not decrease (fig.9c) 0- 4000 m range. As mentioned, for pure  
15 dust  $A_{355/532}^{\beta}$  is negative, so presence of dust in the center of smoke layer should decrease the  
16 backscattering Ångström exponent. The presence of dust in the smoke layer is not surprising,  
17 because upwelling airflows in forest fires region can lift a significant amount of dust together  
18 with biomass burning products.

19 Profiles of lidar ratios at 355 nm and 532 nm, for the same temporal intervals as in (fig.7)  
20 are shown in (fig.10). Lidar ratios in the dust layer at 532 nm and 355 nm for 19:00-23:00 UTC  
21 period are  $LR_{532} = 55 \pm 8$  sr and  $LR_{355} = 70 \pm 10$  sr, respectively. At the top of the elevated layer,  
22 where the smoke particles are predominant, the lidar ratios for the same period are higher:  
23  $LR_{532} = 65 \pm 10$  sr and  $LR_{355} = 75 \pm 11$  sr. Due to the presence of dust in the center of the elevated  
24 layer, the height dependence of lidar ratios shows a decrease, with a minimum at approximately  
25 3000 m for all three temporal intervals. The decrease is more pronounced at 532 nm, because the  
26 difference between smoke and dust lidar ratios is larger at this wavelength. The lidar ratios below  
27 2000 m at 01:00-04:00 and 04:00-07:00 UTC become strongly oscillating because of high  
28 gradients of backscattering and extinction coefficients at low altitudes and are not shown due to  
29 high uncertainties.



1  Fig. 11, shows the dependence of the particle depolarization ratio  $\delta_{532}$  on the extinction  
2 Ångström exponent derived from data in  fig. 7. The depolarization ratio monotonically  
3 decreases while EAE rises from 0 to 0.9.  The observed high values of the depolarization ratio  
4 are attributed to big dust particles with EAE close to zero, while small smoke particles are  
5 characterized by low depolarization (below 10%). If depolarization ratios of smoke  $\delta^s$  and dust  $\delta^d$   
6 are known, the contributions of smoke and dust particles to the total backscattering can be  
7 separated  $\beta = \beta^s + \beta^d$  (Sugimoto and Lee, 2006; Tesche et al., 2009; Miffre et al., 2012; David  
8 et al., 2013, Burton et al., 2014). Assuming  that the depolarization ratios of dust and smoke particles  
9 do not change with height the contributions  $\beta^d$  and  $\beta^s$  can be calculated as suggested by Tesche et  
10 al. (2009):

$$11 \quad \beta^d = \beta \frac{(\delta - \delta^s)(1 + \delta^d)}{(\delta^d - \delta^s)(1 + \delta)} \quad \text{and} \quad \beta^s = \beta - \beta^d, \quad (6)$$

12 In our computations we used values  $\delta^d = 35\%$  and  $\delta^s = 7\%$ .

13 The results of the decomposition of  $\beta_{532}$  for  $\beta_{532}^d$  and  $\beta_{532}^s$  components for the same three  
14 temporal intervals as in  fig. 7 are shown in  fig. 12. This figure presents  total backscattering  
15 coefficient  $\beta_{532}$  together  with particle depolarization ratio  $\delta_{532}$ . The dust contribution to  
16 backscattering is marked with magenta,  while individual backscattering  $\beta_{532} - \beta_{532}^d$  is attributed to  
17 the smoke and is marked with grey. For the height regions with low backscattering the  
18 uncertainty of  $\beta_{532}$  is high, so the decomposition for these regions is not shown. The dust is  
19 predominant below 1700 m for 19:00-23:00 UTC period, however even the elevated layer  
20 contains a significant amount of dust: at 3100 m  $\beta_{532}^d \approx 0.3\beta_{532}$ . After 01:00 UTC the smoke  
21 layers descend  and their contribution to backscattering becomes significant down to 1000  
22 m height. We should recall that though lidars were widely used for the study of smoke layers  
23 over Europe and United States (e.g. Amiridis et al., 2009; Nicolae et al., 2015; Burton et al.,  
24 2015; Veselovskii et al.,  2015) contribution of dust to the smoke layers properties was  
25 normally not considered. However, the contribution of dust may become important since dust  
26 particles in Africa can be lifted during the forest fire and transported over large distances.

27

#### 28 **4. Comparison of lidar measurements with MERRA-2**



1 MERRA-2 [profiles](#) vertical distribution of mass mixing ratios of five aerosol  
2 components, so for each of these components the extinction, backscattering coefficients and  
3 depolarization ratios can be calculated. [Vertical](#) profiles of extinction coefficient of dust, black  
4 carbon (BC), organic carbon (OC), sea salt (SS) and sulfates (SU) together with total extinction  
5  $\alpha_{532}$  are shown in [fig.13](#) for 03:00 UTC and 21:00 UTC on 24 December 2015. At 03:00 UTC  
6 the aerosol is localized below 3000 m. Dust extinction is predominant, but contribution of OC to  
7 the total extinction coefficient rises with height reaching maxima at 2250 m. The presence of a  
8 significant amount of OC agrees with the low values of depolarization ratio above 1500 m for  
9 this temporal interval in [fig.3](#)

10 At 21:00 UTC an elevated layer with a maximum of extinction at 3150 m is observed  
11 [\(fig.13b\)](#). In this layer OC and dust provide similar contributions to extinction (about 40% at  
12 3150 m height). From the results shown in [fig.12a](#) we can estimate the contribution of dust to  
13  $\alpha_{532}$  in the center of elevated layer as 30% (by assuming the dust lidar ratio  $LR_{532}=55$  sr), so the  
14 measured and simulated dust contributions are in good agreement. Below 1750 m the dust is the  
15 main contributor to the extinction coefficient providing 88% of  $\alpha_{532}$  at 1000 m [\(fig.13a\)](#). The  
16 observed dust contribution to  $\alpha_{532}$  at the same height is about 90% [\(fig.12a\)](#), which again shows  
17 good agreement between the model and measurements. Total contribution of BC and SU to  
18 extinction is below 20% in the elevated smoke layer, and in the near-surface dust layer their  
19 contribution is negligible. The extinction coefficients can be recalculated to the backscattering  
20 using model lidar ratios of the aerosol components. Fig.13c shows the profiles of backscattering  
21 coefficients at 532 nm computed for the same temporal interval as in Fig.13b. The simulation of  
22 the backscattering coefficient is more challenging than that of extinction, because backscatter  
23 depends more strongly on the particle morphology and refractive index. A detailed comparison  
24 of measured and modeled profiles of backscattering coefficients will be performed later in this  
25 section.

26 As mentioned, the comparison of model and observed values is more straightforward for  
27 extinction coefficients. Fig.14 shows the time-series of extinction profiles at 355 [nm](#) and 532 nm  
28 modeled for the night of 24-25 December 2015 at 18:00, 21:00, 00:00, 03:00, 06:00 UTC. The  
29 profiles are shifted relative to each other on  $0.1 \text{ km}^{-1}$ . The corresponding profiles of extinction  
30 coefficients measured by Raman lidar are shown in [fig.15](#). [fig.15](#) convenience of comparison,  
31 [fig.16](#) presents measured and modeled  $\alpha_{355}$  profiles from [fig.14](#) and [fig.15](#) now plotted together.



1 The model reproduces well the location of the elevated smoke layer, as well as the top of the  
2 near-surface dust layer. However, the model does not resolve the oscillations of extinction  
3 profile below 2000 m at 03:00 and 06:00 UTC on 25 January.

4 To quantify the difference between measured ( $\alpha_{355}^{\text{meas}}$ ) and modeled ( $\alpha_{355}^{\text{mod}}$ ) extinction  
5 coefficients at 355 nm, [fig. 17](#) shows profiles of extinctions difference  $\Delta\alpha_{355} = \alpha_{355}^{\text{meas}} - \alpha_{355}^{\text{mod}}$  for  
6 results from [fig. 16](#). The difference is normally below  $0.1 \text{ km}^{-1}$ . The frequency distribution of  
7  $\Delta\alpha_{355}$  for all five profiles is shown in [fig. 18](#). The mean value is  $-0.01 \text{ km}^{-1}$  with standard  
8 deviation of  $0.042 \text{ km}^{-1}$ . With typical values of extinction coefficient in elevated smoke layer and  
9 near-surface dust layer being on the order of  $0.2 \text{ km}^{-1}$ , the relative difference of modeled and  
10 measured extinction is estimated to be below 25% for the time period considered.

11 To analyze how well the model reproduces the temporal variations of aerosol optical  
12 depth, [fig. 19](#) presents AODs at 355 nm on 23 – 24 December 2015 for two height intervals: 750  
13 m – 2000 m and 2500 m – 4500 m. The first interval corresponds to the near-surface dust layer,  
14 while the second interval corresponds to the elevated smoke layer. The AOD is calculated from  
15 the Raman backscatter in the day time measurements could be processed only in the dust  
16 layer, due to enhanced background noise. Thus day time measurements in the elevated smoke  
17 layer are not plotted. The time of the appearance of the smoke layer is well represented in the  
18 model results (about 00:00 UTC on 24 December), however the lidar derived AOD of this layer  
19 increases rapidly from the first appearance of the layer, while in the model the rapid increase in  
20 AOD growth starts approximately 5 hours later. The model predicts that the maximum value of  
21 AOD in the smoke layer (0.27) is reached at 20:00–24:00 UTC interval, which reasonably agrees  
22 with observations: mean value of measured AOD for this interval is  $0.23 \pm 0.02$ . After midnight  
23 the modeled AOD of the smoke layer decreases quickly, while lidar measured AOD stays about  
24 0.25. The measured AOD of the near-surface layer agrees with the model. The observed AOD  
25 exceeds the model values in the beginning (at 00:00 UTC on 24 December measured and  
26 modeled AODs are 0.24 and 0.175, respectively), but after 10:00 UTC, the values are in better  
27 agreement. Thus, we can conclude that the model reproduces the temporal variability of AOD in  
28 the dust and smoke layers.

29 The agreement between modeled and observed extinction profiles provides an  
30 opportunity to test how well the backscattering coefficients can be modeled. Simulation of  
31 backscattering coefficients is especially challenging for dust for several reasons. First of all, we



1 are not confident in the accuracy of the presumed scattering phase function in the backward  
 2 direction. Second, the backscattering coefficient strongly depends on the particle refractive  
 3 index, in particular on the imaginary part, which may vary over a wide range depending on dust  
 4 origin. The in situ ground measurements in West Africa, performed during the SAMUM field  
 5 campaign, demonstrate that the mean value of  $m_I$  for dust episodes is about 0.003 at 532 nm and  
 6 0.02 at 355 nm. However deviation from these mean values for every individual measurement  
 7 can be significant (Müller et al., 2009; Kandler et al., 2011; Ansmann et al., 2011). The  
 8 imaginary part of RI of dust in the model is assumed to be 0.007 at 355 nm, following previous  
 9 OMI data analysis (Torres et al., 2007) and 0.0025 at 532 nm.  
 10 Fig. 20 shows measured and modeled backscattering coefficients at 355 nm and 532 nm  
 11 for the same five temporal intervals as in fig. 16. At 355 nm the modeled and measured values  
 12 agree for both the smoke and dust layers. However at 532 nm the backscattering coefficients  
 13 agree only inside elevated layer, while below 1750 m the modeled  $\beta_{532}$  significantly exceeds the  
 14 measured values. As mentioned, the modeled lidar ratio  $LR_{532}$  for the mixture is close to 40 sr at  
 15 1000 m, while the measured lidar ratio in the near surface dust layer is  $55 \pm 8$  sr. The reason for  
 16 this disagreement could be that the assumed imaginary part of the refractive index for dust  
 17 (0.0025 at 532 nm) is too low. Recall however, that we cannot determine the imaginary part of  
 18 the refractive index for dust by simply adjusting the modeled lidar ratio to the measured one,  
 19 because the lidar ratio depends on several factors besides  $m_I$ , such as the particle size distribution  
 20 and the aspect ratio of the ellipsoids used in the model. It is possible that the particle size  
 21 distribution in the model is too much weighted toward fine mode dust.

22 The modeled and measured particle intensive parameters, such as extinction  $A_{355-532}^\alpha$  and  
 23 backscattering  $A_{355-532}^\beta$  Ångström exponents together with the particle depolarization ratio  $\delta_{532}$   
 24 are shown in fig. 21. The measurements are averaged over 19:00 – 23:00 UTC interval while  
 25 modeled values are given for 21:00 UTC. The model reproduces well the observed vertical  
 26 distribution of  $A_{355-532}^\alpha$  both in the dust and the elevated layer. As follows from fig. 7a, inside the  
 27 dust layer  $\beta_{355} < \beta_{532}$ , so the corresponding  $A_{355-532}^\beta$  is negative with a minimum value of about -  
 28 0.4. The model predicts values of  $A_{355-532}^\beta$  as low as -1.4. The modeled BAE is sensitive to the  
 29 choice of the imaginary part of RI at 355 nm and 532 nm and, as mentioned, the chosen  
 30  $m_I(532)=0.0025$  may be too low for this episode. In the elevated layer the modeled  $A_{355-532}^\beta$  is



1 close to the observed one. The modeled BAE has no minimum in the center of elevated layer,  
2 because the modeled ratio of dust and OC aerosol concentrations shows only a small variation  
3 throughout the elevated layer.

4 The model reproduces reasonably well the depolarization in the elevated layer, but inside  
5 the dust layer the modeled  $\delta_{532}$  is significantly lower than what is observed (22% compared to  
6 35%). This problem is well known: the spheroidal model underestimates the depolarization ratio  
7 when typical dust PSD and complex refractive index are used (Veselovskii et al., 2010; Wiegner  
8 et al., 2009; Müller et al., 2013; Nowottnick et al., 2015).

9 One of the MERRA-2 data products is the water vapor mixing ratio (WVMR), which  
10 helps to identify atmospheric parcels, is critically important for determining atmospheric stability  
11 and serves as the source of water for aerosol hygroscopic growth. [Fig. 22](#) shows five model  
12 profiles of WVMR [together](#) with the results of Raman lidar measurements for the same temporal  
13 intervals as in [fig. 14](#). The model reproduces rather well the WVMR profile inside the elevated  
14 layer (2500 m – 4500 m) on 24 December, though on 25 December the modeled values in this  
15 range are lower than the observations. In the near-surface dust layer, the deviation of modeled  
16 values from the measurements is larger. Statistical analysis [of the](#) deviation of modeled values  
17 from lidar measurements for all five profiles (the same as in [fig. 18](#)), shows that mean difference  
18 is 0.04 g/kg with standard deviation of differences of 1.6 g/kg. Thus in the elevated layer, where  
19 WVMR is approximately 8 g/kg, the agreement is quite good, however in the dust layer, which is  
20 characterized by low water vapor content (below 4 g/kg), the difference may be up to 40%.

21

## 22 **5. Inversion of lidar measurements to particle microphysical properties**

23 In the previous section, as validation of the model output we compared the modeled  
24 aerosol optical parameters, such as extinction, backscattering coefficients, and depolarization  
25 ratio with the values derived from lidar measurements in a straightforward way. The comparison  
26 of particle microphysical properties such as volume, effective radius and complex refractive  
27 index, however, is not straightforward, since it needs inversion of the measurements and requires  
28 additional assumptions. In the case of dust particles the inversion becomes especially  
29 challenging, because:

- 30 - The size distribution of dust contains a strong coarse mode with particle radii  
31 extending up to ~ 15  $\mu\text{m}$ , and the estimation of properties for such big particles is



- 1           difficult since measurements are only performed in the wavelength range 0.355-1.064  
2            $\mu\text{m}$ ;
- 3           - The inversions have to consider the refractive index as spectrally independent. In fact,  
4           the imaginary part of the dust RI is spectrally dependent with a strong enhancement at  
5           355 nm compared to 532 nm;
  - 6           - The dust particles are not spherical so that the application of Mie formulas for the  
7           forward modeling results in errors in computing the scattering phase function.

8           Regarding **shape** issue, one of the ways to mimic the scattering properties of dust  
9 particles is to use the model of randomly oriented spheroids (Mishchenko et al., 1997; Dubovik  
10 et al., 2006). The implementation of this model for inversion of dust lidar measurements is  
11 described in Veselovskii et al., (2010, 2016), and Müller et al., (2013). This algorithm was used  
12 also for inversion of our  $3\beta+2\alpha$  observations. The range of particle radius in the inversion has  
13 been set to a minimum and maximum of 0.075 and 15  $\mu\text{m}$ , respectively. The real part of RI was  
14 allowed to vary in the range 1.35 - 1.65, while the imaginary part varied in the range 0 - 0.02.  
15 The refractive index was assumed to be spectrally independent. The effects of a possible spectral  
16 dependence of the imaginary part of RI were considered in Veselovskii et al., (2016).

17           Profiles of the effective radius, volume density, and real part of the refractive index  
18 retrieved from optical measurements in **fig.7a** are shown in **fig.23**. The inversion was performed  
19 for two cases, with the assumption of all spherical particles (SVF=0) or all spheroids  
20 (SVF=100%). A realistic solution (for the mixture of spherical and non-spherical particles),  
21 should be closer to spheroids in the dust layer, while in the elevated layer it should be closer to  
22 the results obtained with spheres. The model results provided by MERRA-2 are shown on the  
23 same plot. The effective radius and volume density obtained in assumption of spherical particles  
24 are always higher than the values obtained with spheroids. The modeled effective radius at 1000  
25 m height is 1.1  $\mu\text{m}$ , which is close to  $r_{\text{eff}}=1.0\pm 0.3 \mu\text{m}$  obtained from lidar measurements using  
26 the spheroids model. Lidar derived effective radius in the elevated layer at 3000 m is  
27 approximately 0.4  $\mu\text{m}$  and 0.5  $\mu\text{m}$  when spheroids and spheres are used respectively, while the  
28 modeled value is 0.3  $\mu\text{m}$ . The reason for the lower value of modeled effective radius is the  
29 contribution of black carbon, which is characterized by small size and relatively low hygroscopic  
30 growth. Recall that in the inversion of lidar measurements, the smallest radius considered is





1 0.075  $\mu\text{m}$ . Modeled values of the volume density agree well with lidar retrievals in both dust and  
2 elevated layers.

3 The estimation of the real part of RI from lidar measurements is sensitive to the type of  
4 kernel functions chosen for retrieval. In the regularization algorithm the treatment of dust  
5 particles as spheres strongly underestimates  $m_R$  (Veselovskii et al., 2010), so results obtained  
6 with spheres in the dust layer are not shown in fig.23c. At 1000 m the  $m_R$  retrieved with  
7 spheroids is  $1.52 \pm 0.05$ , which agrees well with the modeled value. Inside the elevated smoke  
8 layer, where fine mode particles predominate, the application of spheroids overestimates  $m_R$ . The  
9 lidar derived real part of RI at 3000 m is  $1.43 \pm 0.05$  for spheres and  $1.51 \pm 0.05$  for spheroids, so  
10 we expect that the true value would lie within this. The simulated value of  $m_R = 1.50$  in the  
11 elevated layer is quite high, which is again the result of BC contribution.

12 The single scattering albedo (SSA) is one of the key parameters to be retrieved and  
13 conclusions about the potential of the multiwavelength lidar method strongly rely on its ability to  
14 profile SSA. Fig.24 shows SSA at 355 nm, 532 nm and 1064 nm. As mentioned, the spectral  
15 dependence of  $m_I$  was not accounted for and the algorithm retrieves an average value of the  
16 imaginary part over the interval of 355 nm – 1064 nm. In particular, for dust and OC the  
17 imaginary part is underestimated at 355 nm and overestimated at 532 nm and 1064 nm. As a  
18 result, in the dust layer the retrieved SSA exceeds the model values at 355 nm, while at 532 nm  
19 and 1064 nm the situation is opposite. Still at a height of 1000 m, the difference between modeled  
20 and lidar derived SSAs is below 0.04 for all wavelengths. In the elevated layer, where the  
21 spectral dependence of  $m_I$  is less pronounced, the simulated and retrieved SSA agree well with a  
22 corresponding difference of less than 0.02.

23

## 24 6. Summary and conclusion

25 In our study we have considered a smoke/dust episode over West Africa to compare the  
26 vertical profiles of particle parameters modeled by MERRA-2 and retrieved from Raman lidar  
27 measurements. The Raman lidar provides profiles of backscattering and extinction coefficients at  
28 355 nm and 532 nm with uncertainty below 10%, so comparison of these parameters with model  
29 predictions can be considered as a type validation. In the case we selected, the simultaneous  
30 presence of the dust and smoke layers resulted in significant height variation of particle



1 parameters, providing a good opportunity to test the models' capability to reproduce complicated  
2 vertical structure.

3 Modeled and observed vertical profiles of  $\alpha_{355}$  and  $\alpha_{532}$  show good similarity: MERRA-2  
4 provides the correct location of both the near-surface and elevated layers. The mean difference  
5 between modeled and observed extinction coefficients for profiles considered is approximately  
6  $0.01 \text{ km}^{-1}$  with standard deviation of  $0.042 \text{ km}^{-1}$ . Good coherence between measured and  
7 modeled extinction provides an opportunity to test, how well the model reproduces particle  
8 backscattering. One of the issues in such a comparison is the spectral dependence of the  
9 imaginary part of the refractive index of dust. The  $m_I$  can change significantly for dust of  
10 different origin and this variability may be accounted for in future model developments. Still  
11 even for the current version, comparisons of modeled and measured  $\beta_{355}$  show good agreement in  
12 the dust layer. At 532 nm however, the modeled backscattering coefficients in the dust layer  
13 exceed the observed values. The modeled lidar ratio is about 40 sr, while the measured  $LR_{532}$  in  
14 the dust layer is about 55 sr. This discrepancy may be an indication that  $m_I$  of dust during the  
15 episode considered is higher than the value assumed in the model. Another possible explanation  
16 is that the model particle size distribution is too much weighted toward fine mode dust. The  
17 backscattering coefficients inside the smoke layer agree with modeled values for both 355 nm  
18 and 532 nm wavelengths. The measured lidar ratios at the top of the elevated layer, where smoke  
19 particles are predominant, are  $LR_{355}=75\pm 11$  sr and  $LR_{532}=70\pm 10$  sr, which is close to the  
20 corresponding model values for organic carbon of 71 sr and 66 sr, respectively.

21 MERRA-2 predicts the existence of a significant amount of dust in the elevated smoke  
22 layer, and the high values of observed depolarization ratio agree with this prediction. The  
23 existence of minima of  $A_{355/532}^{\beta}$  in the center of elevated layer, characterized by the highest  $\delta_{532}$   
24 also supports this finding. Moreover, the lidar ratios at both 355 and 532 nm also have a minima  
25 in the center of the layer because the lidar ratio of dust is lower than that of smoke. The  
26 contributions of dust and smoke particles to the backscattering and extinction coefficient at 532  
27 nm evaluated from particle depolarization ratio agree with the values provided by the model. We  
28 should recall that in lidar studies of forest fire smoke variation of the depolarization ratio  
29 throughout the smoke plume is usually related to the aging processes in the plume. However, we  
30 should also consider the possibility that there may be mineral dust present in the plume, and  
31 MERRA-2 modeling can be helpful for such an analysis.



1  Analysis of only one episode is not sufficient for broad conclusions regarding how well  
2 the model reproduces the vertical distribution of particle properties. More measurements at  
3 different locations are needed. However, the results presented here demonstrate the potential of  
4 synergy between the model and lidar measurements. Analysis of different measurement sessions  
5 along with the use of modeled particle parameters in lidar retrieval schemes are in our future  
6 plans.

7

8 Acknowledgments: The authors are very grateful to IRD-Dakar (Institut de Recherche pour le  
9 Développement) for their welcome and efficient support and also thank the labex CaPPA for  
10 supporting this campaign. The CaPPA project (Chemical and Physical Properties of the  
11 Atmosphere) is funded by the French National Research Agency (ANR) through the PIA  
12 (Programme d'Investissement d'Avenir) under contract "ANR-11-LABX-0005-01" and by the  
13 Regional Council "Nord-Pas de Calais" and the "European Funds for Regional Economic  
14 Development (FEDER). Development of lidar retrieval algorithms was supported by Russian  
15 Science Foundation, (project 16-17-10241).

16

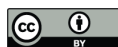

## 1 **References**

- 2 Alexandrov, M. and Mishchenko, M.: Information content of bistatic lidar observations of  
3 aerosols from space, *Opt. Expr.* 25, 134-150, 2017.
- 4 Amiridis, V., Balis, D. S., Giannakaki, E. , Stohl, A., Kazadzis, S., Koukouli, M. E., and Zanis,  
5 P.: Optical characteristics of biomass burning aerosols over southeastern Europe determined  
6 from UV–Raman lidar measurements, *Atmos. Chem. Phys.*, 9, 2431–2440, 2009.
- 7 Ansmann, A., Wandinger, U., Riebesell, M., Weitkamp, C. and Michaelis, W., "Independent  
8 measurement of extinction and backscatter profiles in cirrus clouds by using a combined  
9 Raman elastic-backscatter lidar", *Appl. Opt.* 31, 7113–7131, 1992.
- 10 Ansmann, A., Petzold, A., Kandler, K., Tegen, I., Wendisch, M., Müller, D., Weinzierl, B.,  
11 Müller, T., Heintzenberg, J.: Saharan Mineral Dust Experiments SAMUM–1 and SAMUM–  
12 2: what have we learned?, *Tellus*, 63B, 403–429, 2011.
- 13 Böckmann, C., Miranova, I., Müller, D., Scheidenbach, L., Nessler, R.: “Microphysical aerosol  
14 parameters from multiwavelength lidar,” *J. Opt.Soc. Am. A* 22, 518–528, 2005.
- 15 Buchard, V., Randles, C.A., Da Silva, A.M., Darmenov, A., Colarco, P.R., Govindaraju, R.,  
16 Ferrare, R., Hair, J., Beyersdorf, A.J., Ziemba, L.D., and Yu, H.: The MERRA-2 Aerosol  
17 Reanalysis, 1980 Onward. Part II: Evaluation and Case Studies, *Journal of Climate*, 30,  
18 6851-6872, 2017.
- 19 Burton, S. P., Vaughan, M. A., Ferrare, R. A. and Hostetler, C. A.: Separating mixtures of  
20 aerosol types in airborne High Spectral Resolution Lidar data. *Atmos. Meas. Tech.*, 7, 419–  
21 436, 2014.
- 22 Burton, S. P., Hair, J. W., Kahnert, M., Ferrare, R. A., Hostetler, C. A., Cook, A. L., Harper, D.  
23 B., Berkoff, T. A., Seaman, S. T., Collins, J. E., Fenn, M. A., and Rogers, R. R.:  
24 Observations of the spectral dependence of linear particle depolarization ratio of aerosols  
25 using NASA Langley airborne high spectral resolution lidar, *Atmos. Chem. Phys.* 15, 13453–  
26 13473, 2015.
- 27 Burton, S. P., Chemyakin, E., Liu, X., Knobelspiesse, K., Stamnes, S., Sawamura, P., Moore, R.  
28 H., Hostetler, C. A., and Ferrare, R. A.: Information content and sensitivity of the  $3\beta+2\alpha$   
29 lidar measurement system for aerosol microphysical retrievals, *Atmos.Meas. Tech.*, 9, 5555–  
30 5574, 2016.



- 1 Chemyakin, E., Müller, D., Burton, S., Kolgotin, A., Hostetler, C., Ferrare, R.: “Arrange and  
2 average algorithm for the retrieval of aerosols parameters from multiwavelength  
3 HSRL/Raman lidar data,” *Appl. Opt.* 53, 7252–7266, 2014.
- 4 Chin, M., Ginoux, P., Kinne, S., Torres, O., Holben, B., Duncan, B., Martin, R.V., Logan, J.A.,  
5 Higurashi, A., Nakajima, T.: Tropospheric aerosol optical thickness from the GOCART  
6 model and comparisons with satellite and Sun photometer measurements, *Journal of the  
7 Atmospheric Sciences*, 59, 461–483, 2002.
- 8 Colarco, P., Da Silva, A., Chin, M., and Diehl, T.: Online simulations of global aerosol  
9 distributions in the NASA GEOS-4 model and comparisons to satellite and ground-based  
10 aerosol optical depth. *Journal of Geophysical Research* 115, doi:10.1029/2009JD012820,  
11 2010.
- 12 Colarco, P. R., Nowottnick, E. P., Randles, C. A., Yi, B., Yang, P., Kim, K.-M., Smith, J. and  
13 Bardeen, C.G.: Impact of radiatively interactive dust aerosols in the NASA GEOS-5 climate  
14 model: Sensitivity to dust particle shape and refractive index. *Journal of Geophysical  
15 Research-Atmospheres*, 119(2), 753–786,. doi:10.1002/2013JD020046, 2014.
- 16 Colarco, P. R., Gasso’, S., Ahn, C., Buchard, V., da Silva, A. M. and Torres, O.: Simulation of  
17 the Ozone Monitoring Instrument Aerosol Index using the NASA Goddard Earth Observing  
18 System Aerosol Reanalysis Products, *Atmos. Meas. Tech. Discuss.*, 1–22, doi:10.5194/amt-  
19 2017-87, 2017.
- 20 David, G., Thomas, B., Nousiainen, T., Miffre, A., and Rairoux, P.: Retrieving simulated  
21 volcanic, desert dust and sea-salt particle properties from two/three-component particle  
22 mixtures using UV-VIS polarization lidar and T matrix, *Atmos. Chem. Phys.*, 13, 6757–  
23 6776, 2013.
- 24 Dubovik, O., Sinyuk, A., Lapyonok, T., Holben, B.N., Mishchenko, M., Yang, P., Eck, T.F.,  
25 Volten, H., Munoz, O., Veihelmann, B., van der Zande, W.J., Leon, J.-F., Sorokin, M.,  
26 Slutsker, I.: Application of spheroid models to account for aerosol particle nonsphericity in  
27 remote sensing of desert dust, *J. Geophys. Res.*, 111, D11208, doi:10.1029/2005JD006619,  
28 2006.
- 29 Freudenthaler, V., Esselborn, M., Wiegner, M., Heese, B., Tesche, M. and co-authors:  
30 Depolarization ratio profiling at several wavelengths in pure Saharan dust during SAMUM  
31 2006, *Tellus* 61B, 165–179, 2009.



- 1
- 2 Gelaro, R., McCarty, W., Suarez, M.J., Todling, R., Molod, A., Takacs, L., Randles, C.A.,  
3 Darmenov, A., Bosilovich, M.G., Reichle, R., Wargan, K., Coy, L., Cullather, R., Draper,  
4 C., Akella, S., Buchard, V., Conaty, A., Da Silva, A.M., Gu, W., Kim, G.K., Koster, R.,  
5 Lucchesi, R., Merkova, D., Nielsen, J.E., Partyka, G., Pawson, S., Putman, W., Rienecker,  
6 M., Schubert, S.D., Sienkiewicz, M., and Zhao, B.: The Modern-Era Retrospective Analysis  
7 for Research and Applications, Version 2 (MERRA-2), *Journal of Climate*, 30, 5419-5454  
8 2017.
- 9 Gerber, H. E., 1985: Relative-humidity parameterization of the Navy Aerosol Model (NAM).  
10 Tech. Rep. NTIS ADA1632090, Naval Research Laboratory, Washington, DC.
- 11 Hammer, M. S., Martin, R. V., van Donkelaar, A., Buchard, V., Torres, O., Ridley, D. A. and  
12 Spurr, R. J. D.: Interpreting the ultraviolet aerosol index observed with the OMI satellite  
13 instrument to understand absorption by organic aerosols: implications for atmospheric  
14 oxidation and direct radiative effects, *Atmos Chem Phys*, 16, 2507–2523, 2016.
- 15 Hess, M., Koepke, P., and Schult, I.: Optical properties of aerosols and clouds: The software  
16 package OPAC, *Bulletin of the American Meteorological Society*, 79, 831–844, 1998.
- 17 Kahnert, M. and Andersson, E: How much information do extinction and backscattering  
18 measurements contain about the chemical composition of atmospheric aerosol? *Atmos.*  
19 *Chem. Phys.*, 17, 3423–3444, 2017.
- 20 Kandler, K., Lieke, K., Benker, N., Emmel, C., Küpper, M., Müller-Ebert, D., Ebert, M.,  
21 Scheuven, D., Schladitz, A., Schütz, L., Weinbruch, S.: Electron microscopy of particles  
22 collected at Praia, Cape Verde, during the Saharan Mineral Dust Experiment: Particle  
23 chemistry, shape, mixing state and complex refractive index. *Tellus* 63B, 475-496, 2011.
- 24 Klett, J. D.: Stable analytical inversion solution for processing lidar returns, *Appl. Opt.* **20**, 211–  
25 220, 1981.
- 26 Kolgotin, A., Müller, D., Chemyakin, E., Romanov, A.: “Improved identification of the solution  
27 space of aerosol microphysical properties derived from the inversion of profiles of lidar  
28 optical data, part 1: theory,” *Appl. Opt.* 55, 9839–9849, 2016.
- 29 Miffre, A., David, G., Thomas, B., Rairoux, P., M. Fjaeraa, A., Kristiansen, N.I., Stohl, A.:  
30 Volcanic aerosol optical properties and phase partitioning behavior after long-range

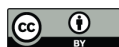

- 1            advection characterized by UV-Lidar measurements, *Atmospheric Environment* 48, 76-84,  
2            2012.
- 3    Mishchenko, M.I., L.D. Travis, R.A. Kahn, and R.A. West, Modeling phase functions for  
4            dustlike tropospheric aerosols using a mixture of randomly oriented polydisperse spheroids,  
5            *J. Geophys. Res.*, Vol. 102, 16831-16847, 1997
- 6    Müller, D., Wandinger, U., and Ansmann, A.: Microphysical particle parameters from extinction  
7            and backscatter lidar data by inversion with regularization: theory, *Appl. Opt.* 38, 2346-2357,  
8            1999.
- 9    Müller, D., Mattis, I., Wandinger, U., Ansmann, A., Althausen, D., Stohl, A.: Raman lidar  
10           observations of aged Siberian and Canadian forest fire smoke in the free troposphere over  
11           Germany in 2003: Microphysical particle characterization, *J. Geophys. Res.*, 110, D17201,  
12           doi:10.1029/2004JD005756, 2005.
- 13   Müller, D., Veselovskii, I., Kolgotin, A., Tesche, M., Ansmann, A., Dubovik, O.: Vertical  
14           profiles of pure dust (SAMUM-1) and mixed smoke-dust plumes (SAMUM-2) inferred from  
15           inversion of multiwavelength Raman/polarization lidar data and comparison to AERONET  
16           retrievals and in-situ observations, *Appl. Opt.* 52, 3178-3202, 2013.
- 17   Müller, D., Böckmann, C., Kolgotin, A., Schneidenbach, L., Chemyakin, E., Rosemann, J.,  
18           Znak, P., and Romanov, A.: Microphysical particle properties derived from inversion  
19           algorithms developed in the framework of EARLINET, *Atmos. Meas. Tech.*, 9, 5007–5035,  
20           2016.
- 21   Müller, T., Schladitz, A., Massling, A., Kaaden, N., Kandler, K. and Wiedensohler A.: Spectral  
22           absorption coefficients and imaginary parts of refractive indices of Saharan dust during  
23           SAMUM-1, *Tellus* 61B, 79–95, 2009.
- 24   Nicolae D., A. Nemuc, D. Müller, C. Talianu, J. Vasilescu, L. Belegante, and A. Kolgotin:  
25           Characterization of fresh and aged biomass burning events using multi-wavelength Raman  
26           lidar and mass spectrometry, *J. Geophys. Res.* 118, 2956–2965, doi:10.1002/jgrd.50324,  
27           2013.
- 28   Nowotnick, E. P., Colarco, P. R., Welton, E. J., da Silva, A.: Use of the CALIOP vertical feature  
29           mask for evaluating global aerosol models, *Atm. Meas. Tech.* 8, 3647–3669, 2015.
- 30   Pérez-Ramírez, D., Whiteman, D. N., Veselovskii, I., Kolgotin, A., Korenskiy, M., and  
31           Alados-Arboledas, L.: Effects of systematic and random errors on the retrieval of particle



- 1 microphysical properties from multiwavelength lidar measurements using inversion with  
2 regularization, *Atmos. Meas. Tech.*, 6, 3039–3054, 2013.
- 3 Randles, C.A., Da Silva, A.M., Buchard, V., Colarco, P.R., Darmenov, A., Govindaraju, R.,  
4 Smirnov, A., Holben, B., Ferrare, R., Hair, J., Shinozuka, Y., and Flynn, J.: The MERRA-2  
5 Aerosol Reanalysis, 1980 Onward. Part I: System Description and Data Assimilation  
6 Evaluation, *J. of Climate*, 30, 6823–6850, 2017.
- 7 Sugimoto, N. and Lee, C. H.: Characteristics of dust aerosols inferred from lidar depolarization  
8 measurements at two wavelength, *Appl. Opt.*, 45, 7468–7474, 2006.
- 9 Tesche, M., Ansmann, A., Müller, D., Althausen, D., Engelmann, R., Freudenthaler, V., and  
10 Groß, S.: Vertically resolved separation of dust and smoke over Cape Verde using  
11 multiwavelength Raman and polarization lidars during Saharan Mineral Dust Experiment  
12 2008, *J. Geophys. Res.*, 114, D13202, doi:10.1029/2009JD011862, 2009.
- 13 Tesche, M., Groß, S., Ansmann, A., Müller, D., Althausen, D., Freudenthaler, V., and Esselborn,  
14 M.: Profiling of Saharan dust and biomass-burning smoke with multiwavelength  
15 polarization Raman lidar at Cape Verde, *Tellus B*, 63, 649–676, doi:10.1111/j.1600-  
16 0889.2011.00548.x, 2011.
- 17 Torres, O., Tanskanen, A., Veihelmann, B., Ahn, C., Braak, R., Bhartia, P.K., Veeffkind, P., and  
18 Levelt, P.: Aerosols and surface UV products from Ozone Monitoring Instrument  
19 observations: An overview, *J. Geophys. Res.*, 112, D24S47, doi:10.1029/2007JD008809,  
20 2007.
- 21 Veselovskii I., Kolgotin, A., Griaznov, V., Müller, D., Wandinger, U., Whiteman, D.: Inversion  
22 with regularization for the retrieval of tropospheric aerosol parameters from multi-  
23 wavelength lidar sounding, *Appl. Opt.* 41, 3685–3699, 2002.
- 24 Veselovskii, I., Kolgotin, A., Griaznov, V., Müller, D., Franke, K., Whiteman, D. N.: Inversion  
25 of multiwavelength Raman lidar data for retrieval of bimodal aerosol size distribution, *Appl.*  
26 *Optics*, 43, 1180–1195, 2004.
- 27 Veselovskii, I., Kolgotin, A., Müller, D., and Whiteman, D. N.: Information content of  
28 multiwavelength lidar data with respect to microphysical particle properties derived from  
29 eigenvalue analysis, *Appl. Optics*, 44, 5292–5303, 2005.
- 30 Veselovskii I., O. Dubovik, A. Kolgotin, T. Lapyonok, P. Di Girolamo, D. Summa, D. N.  
31 Whiteman, M. Mishchenko, and D. Tanré, 2010: Application of randomly oriented spheroids





- 1 for retrieval of dust particle parameters from multiwavelength lidar measurements, J.  
2 Geophys. Res., **115**, D21203, doi:10.1029/2010JD014139, 2010.
- 3 Veselovskii, I., Whiteman, D. N., Korenskiy, M., Suvorina, A., Kolgotin, A., Lyapustin, A.,  
4 Wang, Y., Chin, M., Bian, H. Kucsera, T. L., Perez-Ramirez, D., Holben, B.:  
5 Characterization of forest fire smoke event near Washington, D.C. in Summer 2013 with  
6 multi-wavelength lidar. Atmos. Chem. Phys. 15, 1647–1660, 2015.
- 7 Veselovskii, I., Goloub, P., Podvin, T., Bovchaliuk, V., Derimian, Y., Augustin, P., Fourmentin,  
8 M., Tanre, D., Korenskiy, M., Whiteman, D., Diallo, A., Ndiaye, T., Kolgotin, A., Dubovik,  
9 O.: Study of African dust with multi-wavelength Raman lidar during the “SHADOW”  
10 campaign in Senegal, Atm. Chem. Phys. 16, 7013–7028, 2016.
- 11 Whiteman, D., Melfi, S., Ferrare, R.: Raman lidar system for measurement of water vapor and  
12 aerosols in the Earth's atmosphere", Appl. Opt. 31, 3068-3082, 1992.
- 13 Wiegner, M., Gasteiger, J., Kandler, K., Weinzierl, B., Rasp, K., Esselborn, M., Freudenthaler,  
14 V., Heese, B., Toledano, C., Tesche, M., Althausen, D.: Numerical simulations of optical  
15 properties of Saharan dust aerosols with emphasis on lidar applications. Tellus 61B, 180–  
16 194, 2009.
- 17 Winker, D. M., Vaughan, M. A., Omar, A., Hu, Y., and Powell, K. A.: Overview of the  
18 CALIPSO mission and CALIOP data processing algorithms, J. Atmos. Ocean. Techn., 26,  
19 2310–2323, 2009.
- 20  
21



1

2 **APENDIX**3 **Optical properties of aerosol components in MERRA-2 model.**

4 Table 1 summarizes the main characteristics of five aerosol components: dust, sea salt,  
5 black carbon, organic, carbon and sulfates used in MERRA-2 model. For dust and sea salt five  
6 size bins are considered. All values are given for the relative humidity  $RH=0$ . Thus OC, BC and  
7 SU with the effective radii of  $0.09 \mu\text{m}$ ,  $0.04 \mu\text{m}$  and,  $0.157 \mu\text{m}$  respectively are presented by the  
8 fine fraction only, while dust and sea salt contribute to both fine and coarse fractions.

9 The dust particles are assumed to be hydrophobic, but other aerosol components may  
10 present significant hygroscopic growth. To account for the effect of relative humidity, the growth  
11 factor  $g$ , which is the ratio of particle radius at current RH to the dry particle radius, is  
12 introduced. Fig.A1 shows dependence of the growth factor of different aerosol components on  
13 relative humidity (RH). For sea salt the results are given for five size bins from Table 1. Each bin  
14 has different growth factor:  $g$  increases with increase of particle radius. Relative humidity  
15 modifies also the particle complex refractive index (CRI). Dependence of the real and the  
16 imaginary part of particle components on relative humidity is shown in fig.A2. For dry sea salt  
17 particles RI is supposed to be the same for all size bins. However in the process of hygroscopic  
18 growth the RI of different bins behaves differently: both  $m_R$  and  $m_I$  decrease with bin number  
19 (radius) increasing.

20



1

2 Table 1. Parameters of the aerosol components, such as minimal radius ( $r_{\min}$ ), maximal radius  
 3 ( $r_{\max}$ ), effective radius ( $r_{\text{eff}}$ ), real ( $m_{\text{R}}$ ) and imaginary ( $m_{\text{I}}$ ) part of the refractive index at 355 nm,  
 4 532 nm, 1064 nm used in MERRA-2 model. For dust and sea salt five size bins are considered.  
 5 All values are given for RH=0.

| Component | $r_{\min}$ ,<br>$\mu\text{m}$ | $r_{\max}$<br>$\mu\text{m}$ | $r_{\text{eff}}$<br>$\mu\text{m}$ | $m_{\text{R}355}$ | $m_{\text{R}532}$ | $m_{\text{R}1064}$ | $m_{\text{I}355}$ | $m_{\text{I}532}$ | $m_{\text{I}1064}$ |         |
|-----------|-------------------------------|-----------------------------|-----------------------------------|-------------------|-------------------|--------------------|-------------------|-------------------|--------------------|---------|
| Dust      | Bin 1                         | 0.1                         | 1.0                               | 0.64              | 1.53              | 1.53               | 1.53              | 0.007             | 0.0026             | 0.0022  |
|           | Bin 2                         | 1                           | 1.5                               | 1.32              | 1.53              | 1.53               | 1.53              | 0.007             | 0.0026             | 0.0022  |
|           | Bin 3                         | 1.5                         | 3.0                               | 2.30              | 1.53              | 1.53               | 1.53              | 0.007             | 0.0026             | 0.0022  |
|           | Bin 4                         | 3.0                         | 7.0                               | 4.17              | 1.53              | 1.53               | 1.53              | 0.007             | 0.0026             | 0.0022  |
|           | Bin 5                         | 7.0                         | 10.0                              | 7.67              | 1.53              | 1.53               | 1.53              | 0.007             | 0.0026             | 0.0022  |
| Sea Salt  | Bin 1                         | 0.03                        | 0.1                               | 0.08              | 1.51              | 1.50               | 1.47              | 2.9E-7            | 1.2E-8             | 1.97E-4 |
|           | Bin 2                         | 0.1                         | 0.5                               | 0.27              | 1.51              | 1.50               | 1.47              | 2.9E-7            | 1.2E-8             | 1.97E-4 |
|           | Bin 3                         | 0.5                         | 1.5                               | 1.07              | 1.51              | 1.50               | 1.47              | 2.9E-7            | 1.2E-8             | 1.97E-4 |
|           | Bin 4                         | 1.5                         | 5                                 | 2.55              | 1.51              | 1.50               | 1.47              | 2.9E-7            | 1.2E-8             | 1.97E-4 |
|           | Bin 5                         | 5                           | 10                                | 7.3               | 1.51              | 1.50               | 1.47              | 2.9E-7            | 1.2E-8             | 1.97E-4 |
| OC        | 0.01                          | 0.29                        | 0.09                              | 1.53              | 1.53              | 1.52               | 0.048             | 0.009             | 0.016              |         |
| BC        | 0.01                          | 0.29                        | 0.04                              | 1.75              | 1.75              | 1.75               | 0.46              | 0.44              | 0.44               |         |
| SU        | 0.01                          | 0.29                        | 0.157                             | 1.45              | 1.43              | 1.42               | 1E-8              | 1E-8              | 2.9E-6             |         |

6

7

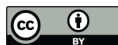

1

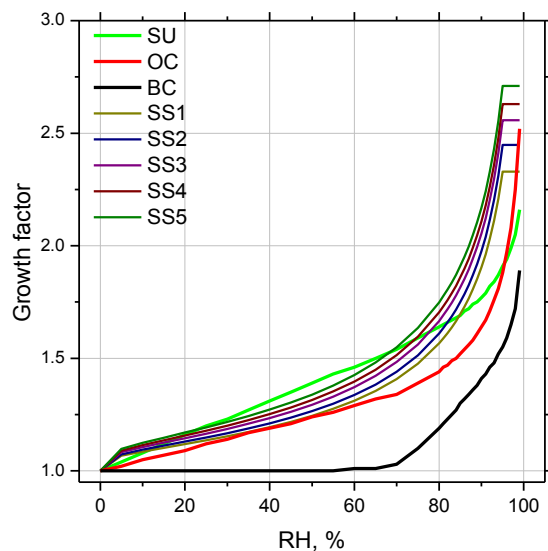

2

3 Fig.A1. Dependence of the growth factor of organic carbon, black carbon, sulfates and sea salt  
4 on relative humidity (RH) used in MERRA-2. For the sea salt the results are given for five size  
5 bins from Table 1. The growth factor increases with increase of bin number.

6

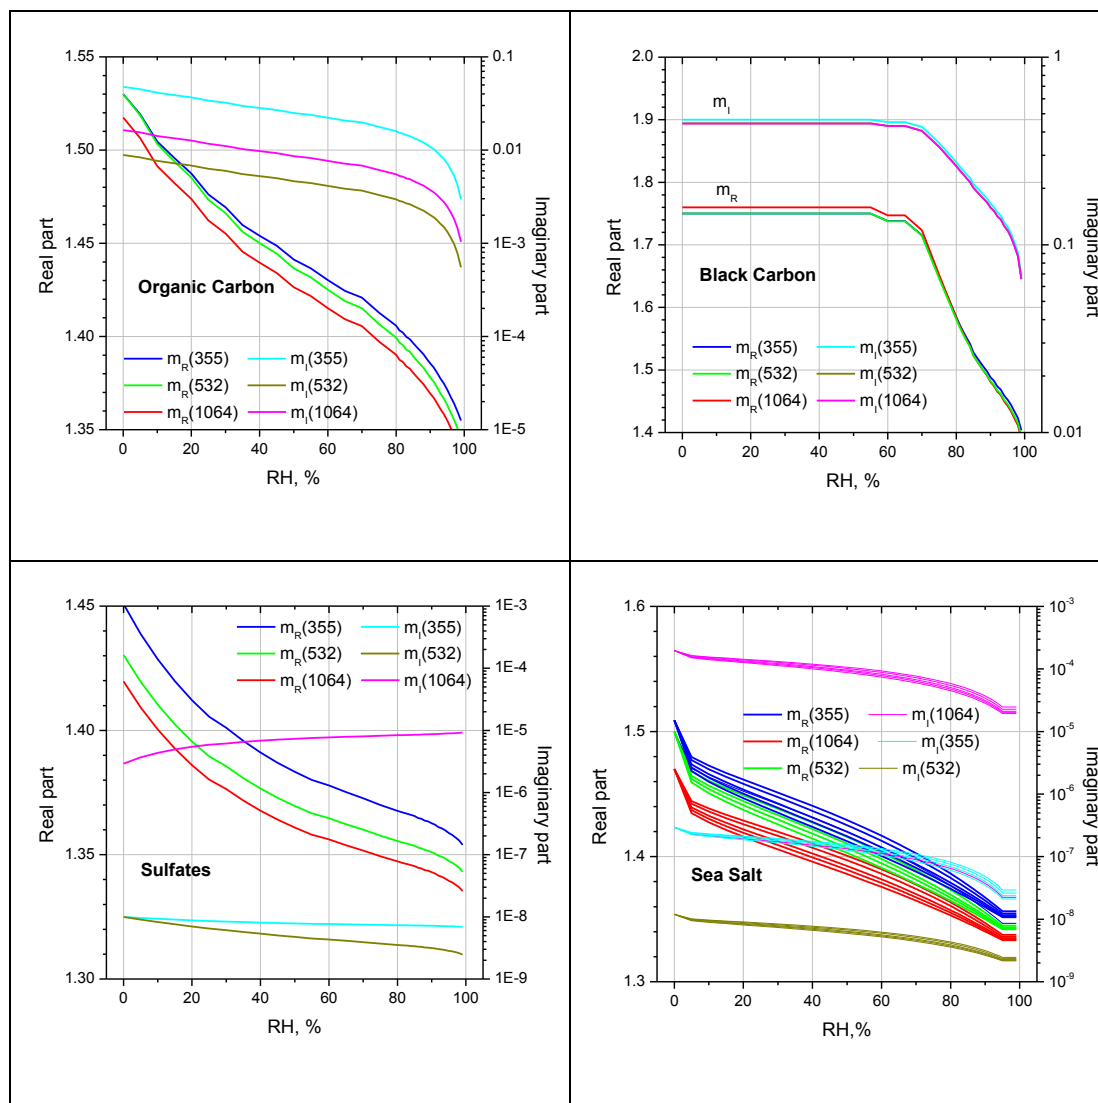

1  
 2 Fig.A2. Dependence of the real and imaginary part of the refractive index of organic carbon,  
 3 black carbon, sulfates and sea salt on relative humidity (RH) used in the MERRA-2 model. For  
 4 the sea salt the results are given for five size bins from Table 1. Both  $m_R$  and  $m_I$  decrease with  
 5 bin number increasing.  
 6



NOAA HYSPLIT MODEL  
Backward trajectories ending at 0400 UTC 25 Dec 15  
GDAS Meteorological Data

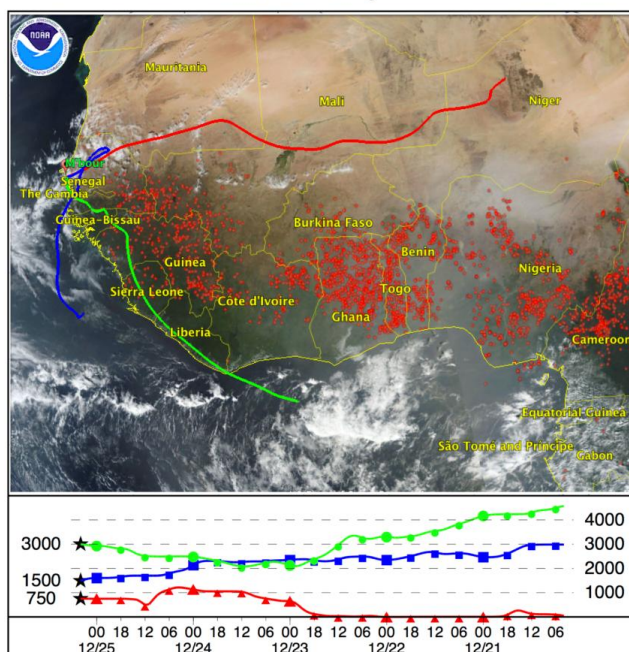

1

2 Fig.1. Five-day backward trajectories for the air mass in Mbour at altitudes 750 m, 1500 m, 3500  
3 m, on 25 December 2015 at 04:00 UTC together with the map of forest fires on 20 December  
4 2015.

5

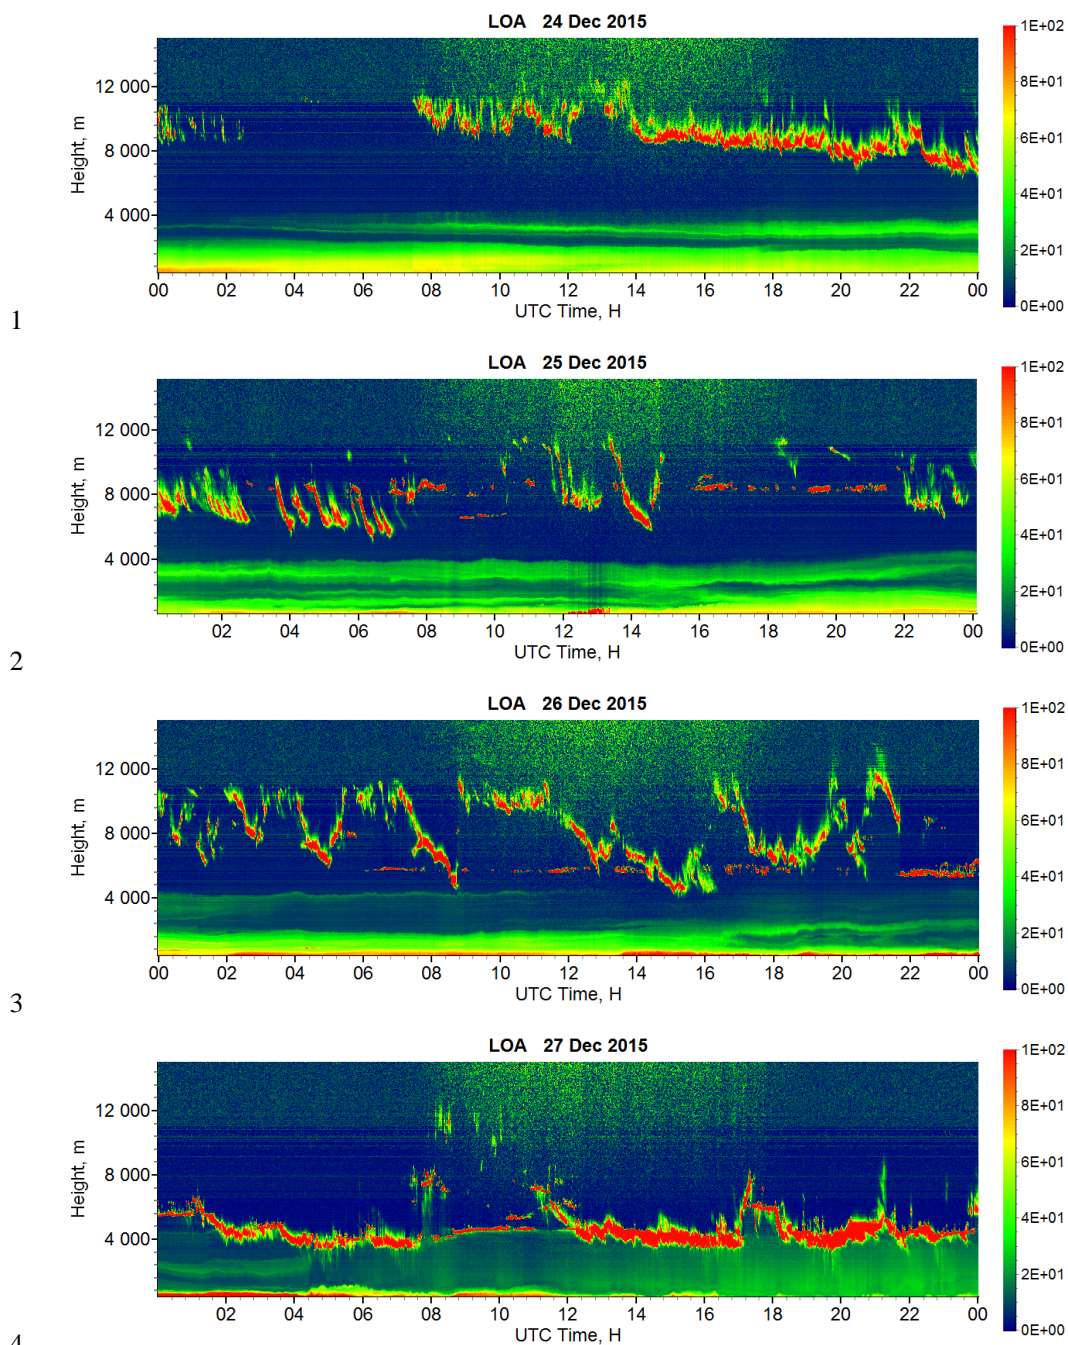

5 Fig.2. Range corrected signal of Cimel MPL for 24 - 27 December 2015.

6

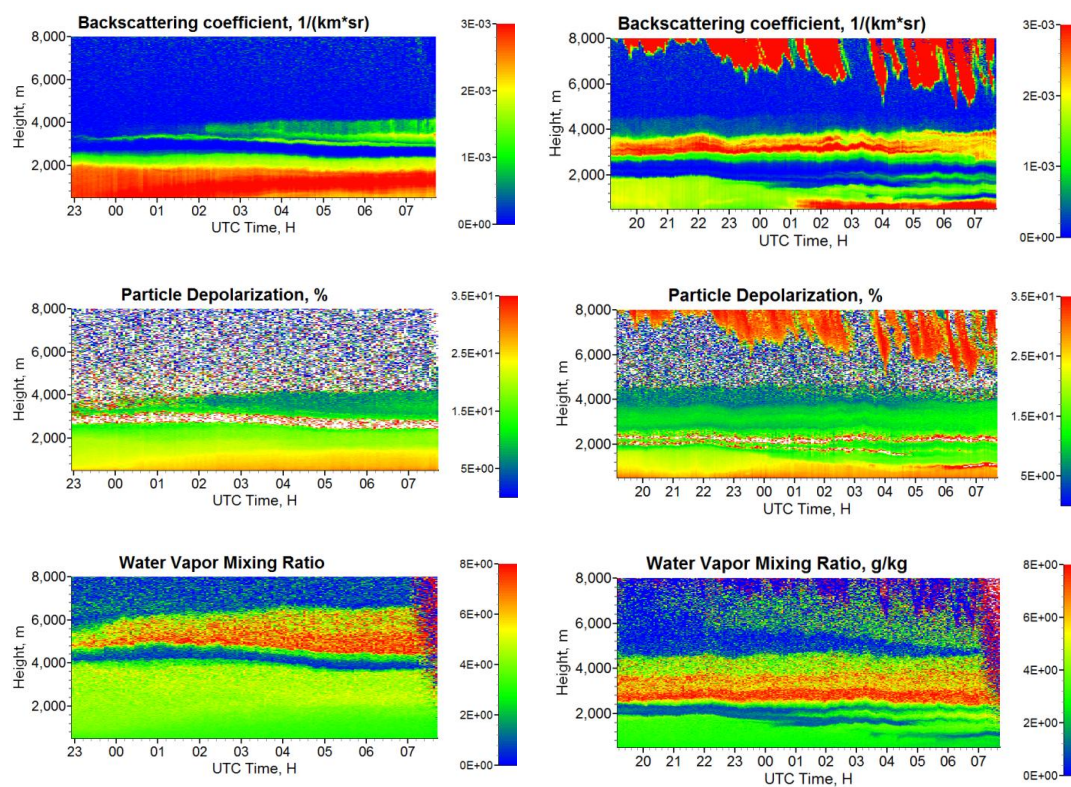

1 Fig.3 Height-temporal distributions of the backscattering coefficient and particle depolarization  
2 ratio at 532 nm together with the water vapor mixing ratio derived from the Raman lidar  
3 measurements on the nights 23-24 (left column) and 24-25 December 2015 (right column).  
4



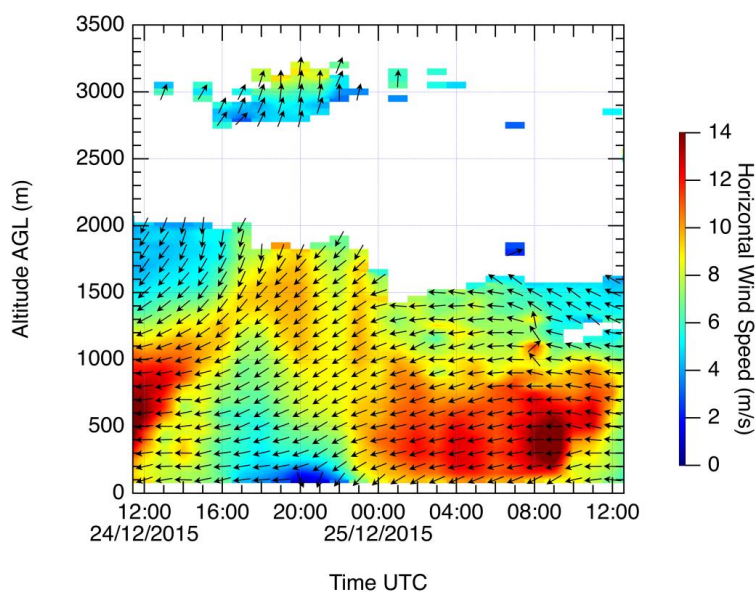

1  
2 Fig.4. Time-height section of horizontal wind direction (arrows) and wind speed (color map)  
3 deduced from Doppler lidar during 24-25 December 2015. Leftward and downward arrows  
4 represent, respectively, easterly wind and northerly wind

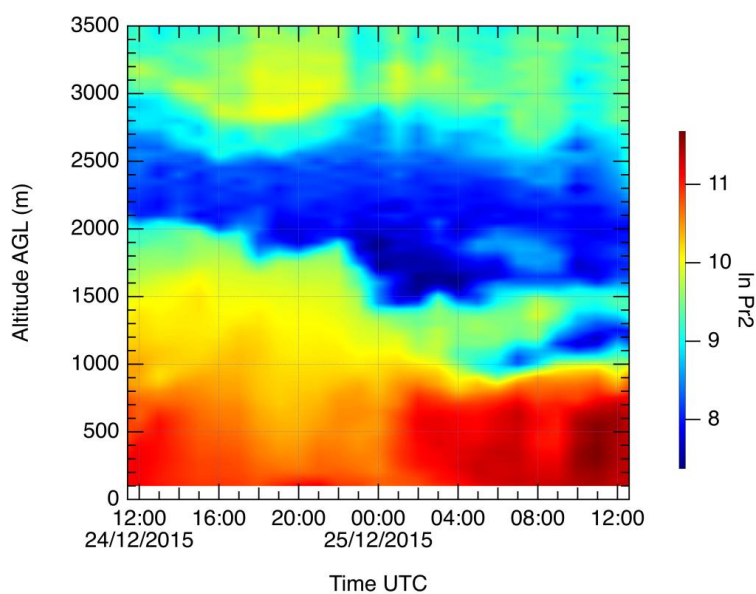

5  
6 Fig.5. Time-height section of the logarithmic range corrected lidar signal (in arbitrary units)  
7 deduced from the Doppler lidar measurements during the 24-25 December 2015 night.



1  
2

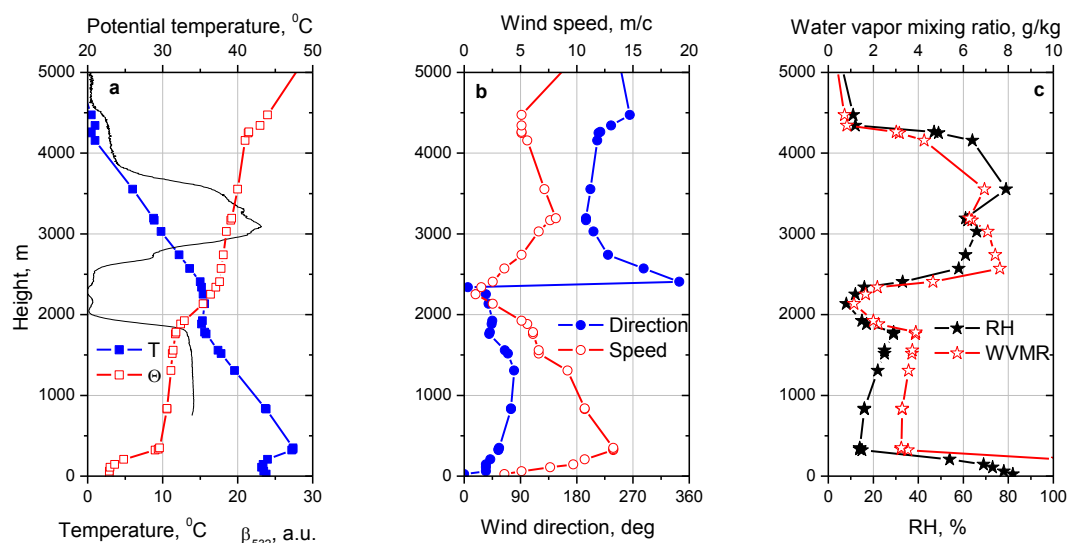

3

4 Fig.6. Vertical profiles of (a) temperature  $T$ , potential temperature  $\Theta$ , (b) wind direction and  
5 speed and (c) relative humidity  $RH$  and water vapor mixing ratio ( $WVMR$ ) measured by the  
6 radio sonde in Dakar at 00:00 on 25 December 2017. Solid line in plot (a) shows backscattering  
7 coefficient at 532 nm in arbitrary units measured with the Raman lidar at 21:00 on 24 December.

8



1

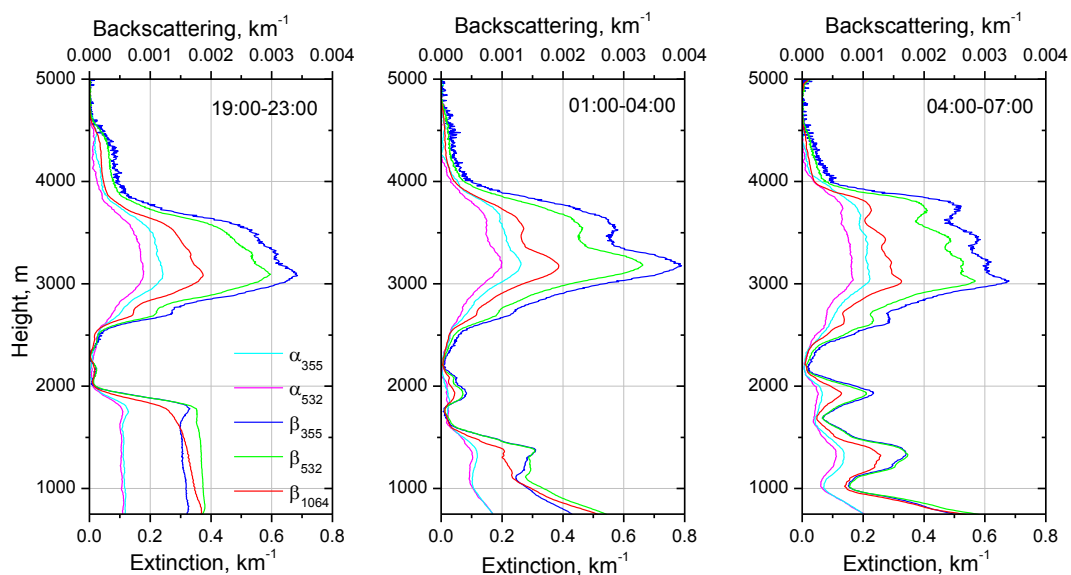

2  **Fig. 7.** Vertical profiles of **particle backscattering** ( $\beta_{355}$ ,  $\beta_{532}$ ,  $\beta_{1064}$ ) and extinction ( $\alpha_{355}$ ,  $\alpha_{532}$ )  
3 coefficients for three temporal intervals: 19:00-23:00, 01:00-04:00 and 04:00-07:00 UTC on 24-  
4 25 December **2015.**

5

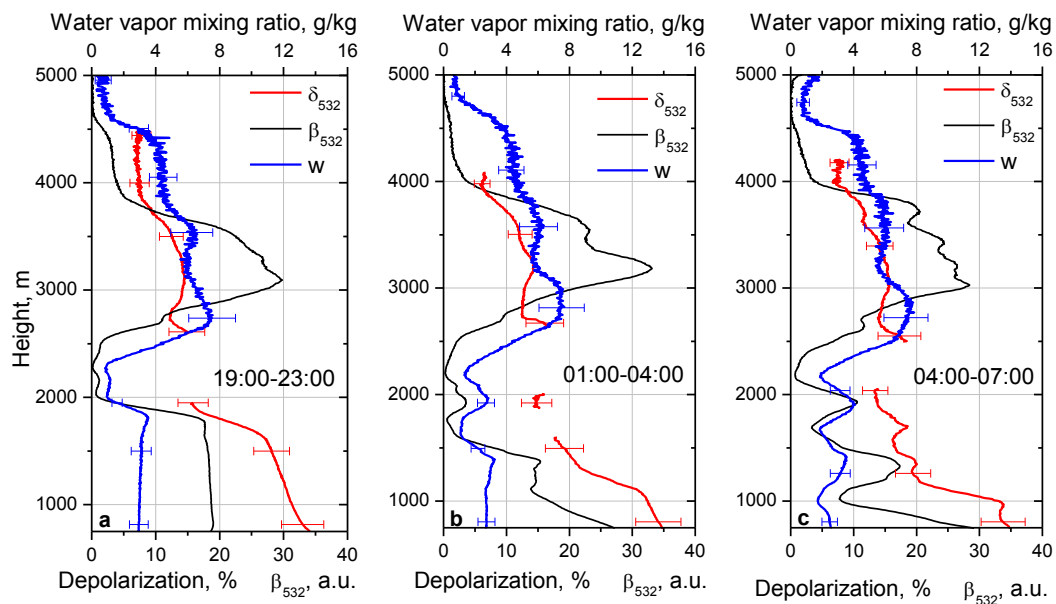

1 Fig.8. Particle depolarization ratio  $\delta_{532}$  and water vapor mixing ratio  $w$  together with  
2 backscattering coefficient  $\beta_{532}$  for the same three temporal intervals as in fig.  
3



1

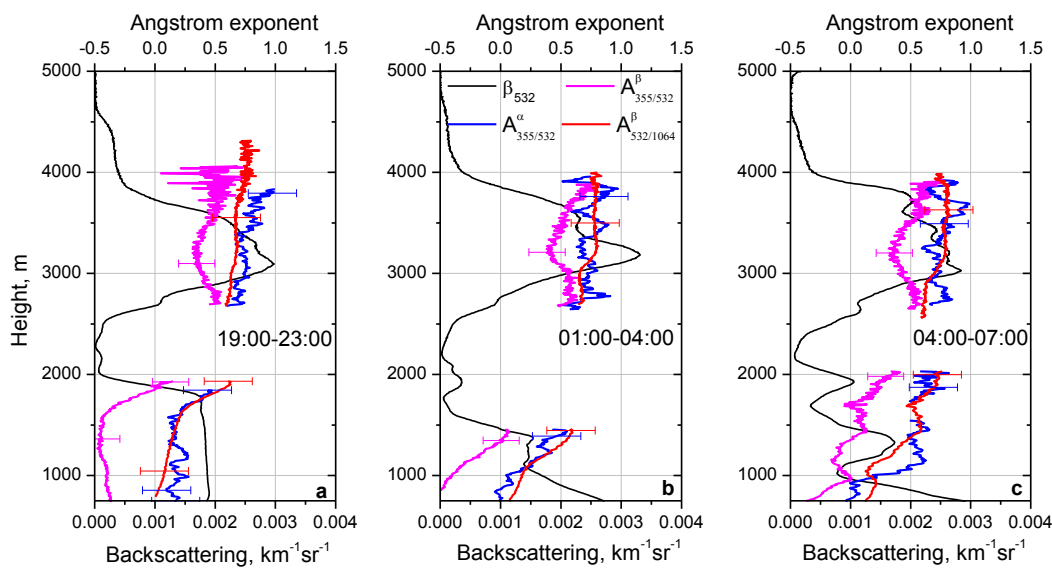

2  **Fig.9** Extinction ( $A_{355/532}^{\alpha}$ ) and **backscattering** ( $A_{355/532}^{\beta}, A_{532/1064}^{\beta}$ ) Ångström exponents together  
 3 with backscattering coefficient  $\beta_{532}$  for the same three temporal intervals as in   
 4



1

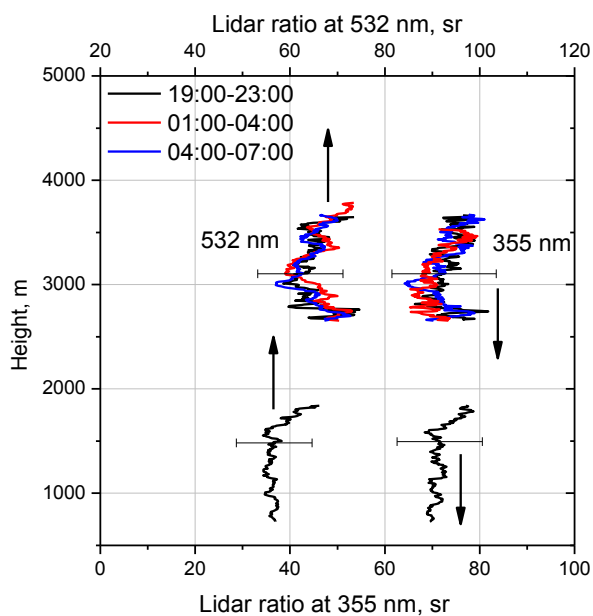

2

3 Fig.10. Lidar ratios at 355 nm and 532 nm for three temporal intervals from [fig. 7](#).

4

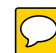

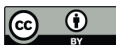

1

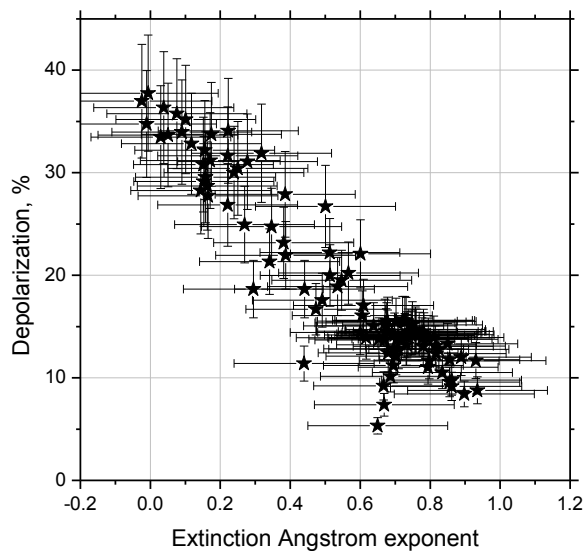

2  
3  
4  
5  
6

Fig.11. Particle depolarization ratio as a function of the extinction Ångström exponent derived from data shown in [fig.8, 9](#) 



1

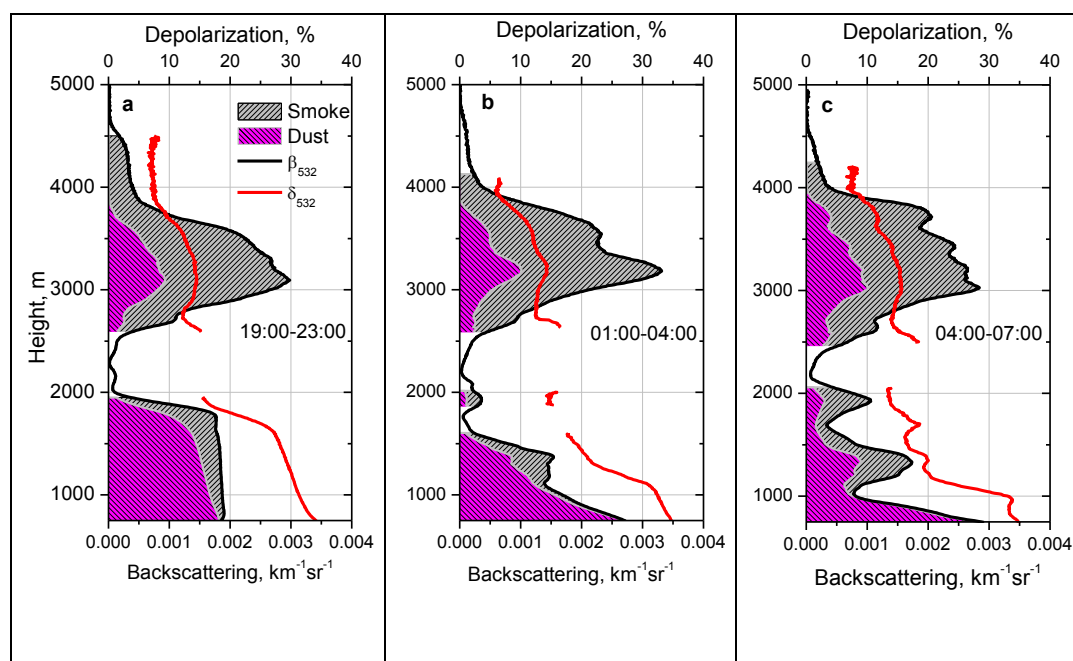

2 Fig.12. Contributions of dust and smoke to the total backscattering coefficient  $\beta_{532}$  together with  
 3 particle depolarization ratio  $\delta_{532}$  for three temporal intervals on 24-25 December 2015. Magenta  
 4 and grey regions correspond to dust and smoke contribution to total scattering  $\beta_{532} = \beta_{532}^d + \beta_{532}^s$ .  
 5





1  
2

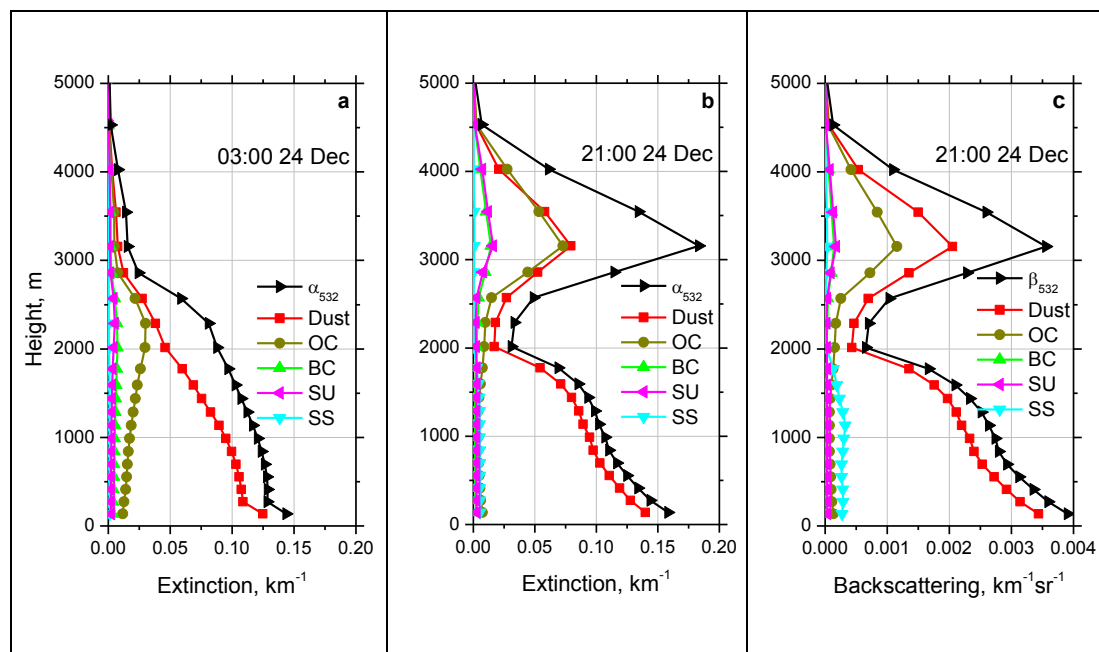

3  
4 Fig.13. Vertical profiles of extinction coefficients at (a) 03:00 UTC, (b) 21:00 UTC and (c)  
5 backscattering coefficients at 21:00 UTC on 24 December 2015 from MERRA-2 model at 532  
6 nm. Profiles are given for five aerosol components: dust, black carbon (BC), organic carbon  
7 (OC), sea salt (SS), sulfates (SU) together with total extinction  $\alpha_{532}$  and backscattering  $\beta_{532}$ .  
8

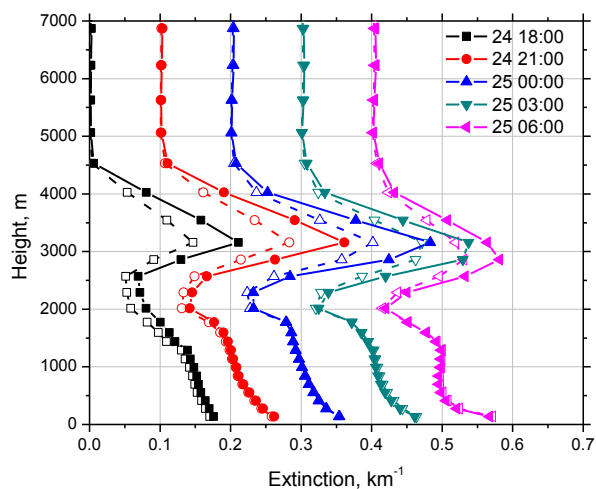

1  
2 Fig.14. Profiles of extinction coefficient at 355 nm (solid symbols) and 532 nm (open symbols)  
3 modeled by MERRA-2 on the night 24-25 December 2015 at 18:00, 21:00, 00:00, 03:00, 06:00  
4 UTC. Profiles are shifted relatively to each other on  $0.1 \text{ km}^{-1}$ .

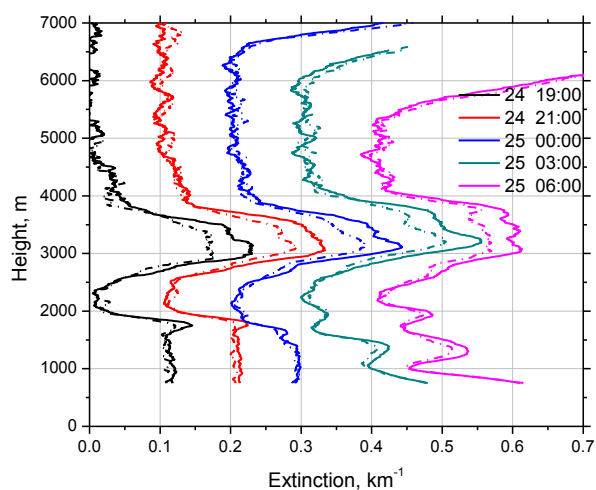

5  
6 Fig.15. Extinction coefficients at 355 nm (solid line) and 532 nm (dash-dot) derived from Raman  
7 lidar measurements on the night 24-25 December 2015. Profiles are given for temporal intervals  
8 centered at: 19:00, 21:00, 00:00, 03:00, 06:00 UTC. For each file 2 hours of measurements  
9 are averaged. The profiles are shifted relatively to each other on  $0.1 \text{ km}^{-1}$ .



1

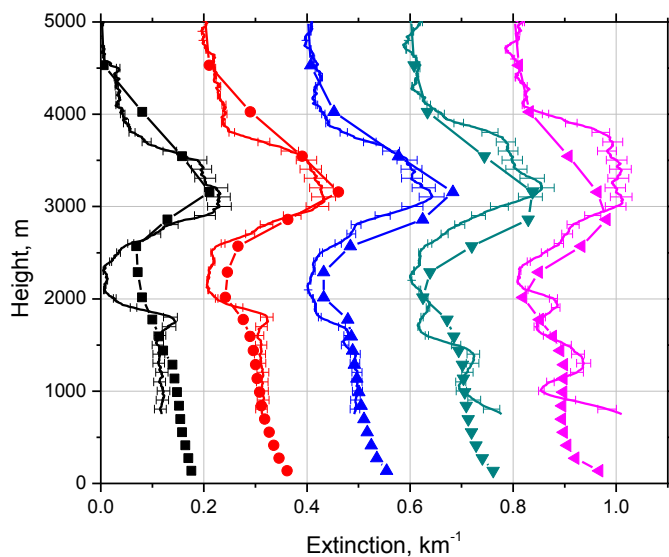

2

3 Fig.16. Comparison of extinction profiles at 355 nm measured by lidar (line) and modeled by  
4 ME  (line + symbols) from fig.13 and fig.14. The profiles are shifted relatively to each other  
5 on  0.2 km<sup>-1</sup>.

6

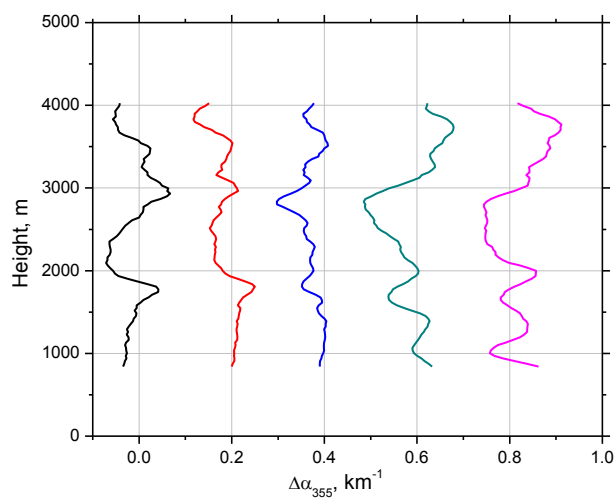

1

2 Fig.17. Difference between measured and modeled extinction coefficient at 355 nm ( $\Delta\alpha_{355}$ ) for  
3 results shown in Fig.16. The profiles are shifted relatively to each other on  $0.2 \text{ km}^{-1}$ .

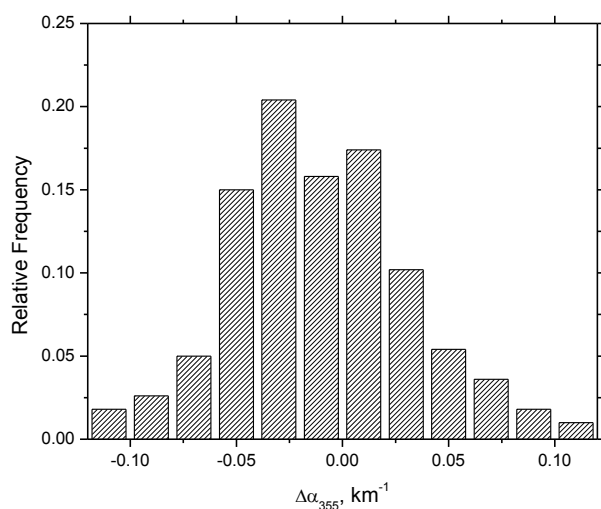

4

5 Fig.18. Relative frequency of  $\Delta\alpha_{355}$  for profiles in Fig.16. The mean value is  $-0.01 \text{ km}^{-1}$  with the  
6 standard deviation of  $0.042 \text{ km}^{-1}$ .

7



1

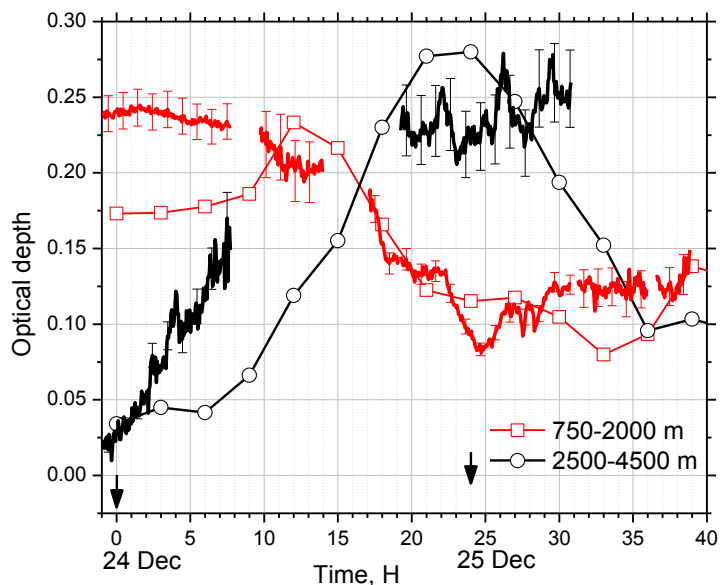

2

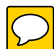

3 Fig.19. **Optical** depth at 355 nm on 23 – 24 December 2015 obtained from MERRA-2 (line +  
4 symbols) and from the Raman lidar measurements (solid lines). The results are given for two  
5 height intervals: 750 m – 2000 m (red) and 2500 m – 4500 m (black). Zero of time scale  
6 corresponds to 00:00 UTC on 24 December.

7

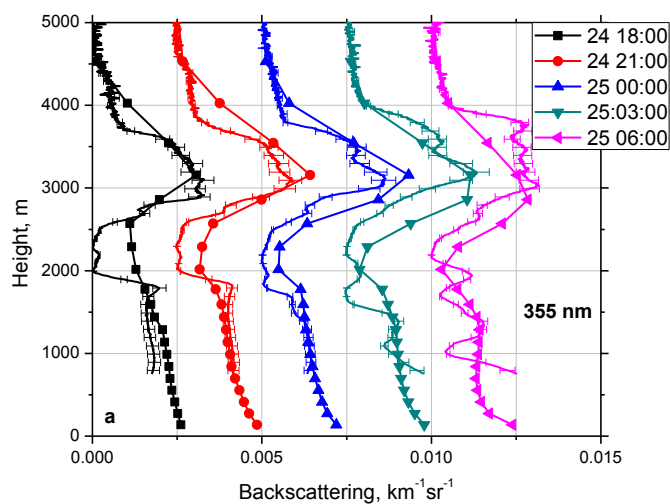

1

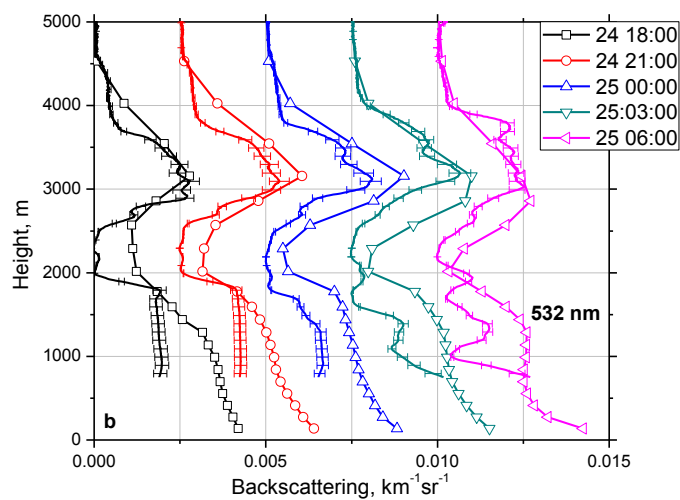

2

3 Fig.20. Backscattering coefficients at (a) 355 nm and (b) 532 nm measured by Raman lidar (solid  
4 line) and modeled by MERRA-2 (line + symbols) on the night 24-24 December 2015. Profiles  
5 are shifted relatively to each other on  $25 \text{ km}^{-1} \text{sr}^{-1}$ . The temporal intervals are the same as in  
6 [fig. 14, 15](#), 

7



1

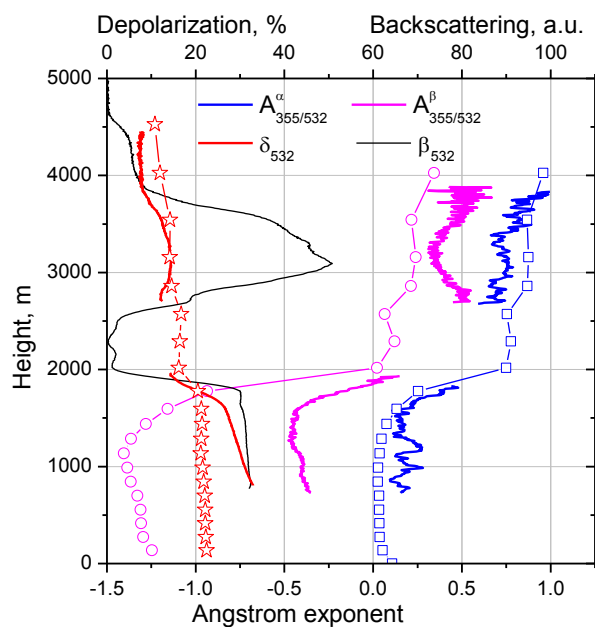

2

3 Fig.21. Extinction ( $A_{355/532}^{\alpha}$ ) and backscattering ( $A_{355/532}^{\beta}$ ) Ångström exponents together with the  
4 particle depolarization ratio  $\delta_{532}$  obtained from lidar measurements (line) and from MERRA-2  
5 modeling (line + symbols). Lidar data are averaged over 19:00 – 23:00 UTC period while model  
6 data are given for 21:00 UTC.

7

8



1

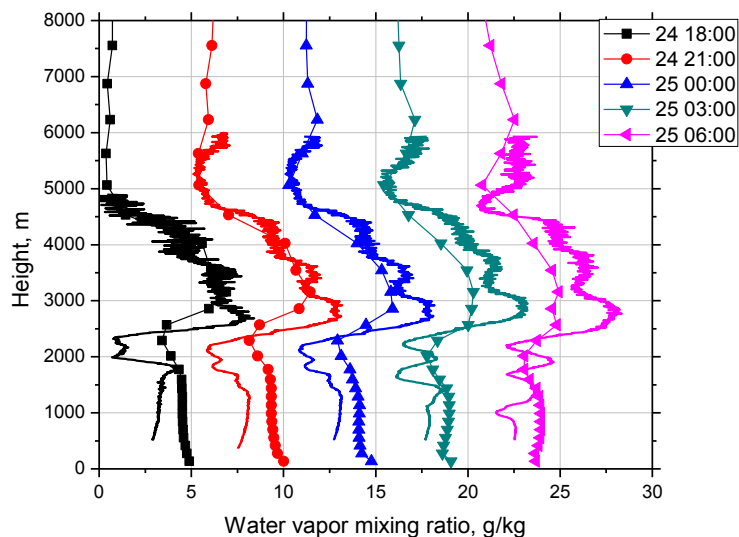

2

3 Fig.22. Water vapor mixing ratio derived from Raman lidar measurements (solid line) and  
4 obtained from the model (line + symbols) on the night 24-25 December 2015. Temporal intervals  
5 are the same as in [fig.14](#) profiles are shifted relatively each other [on](#) g/kg.

6





1

2

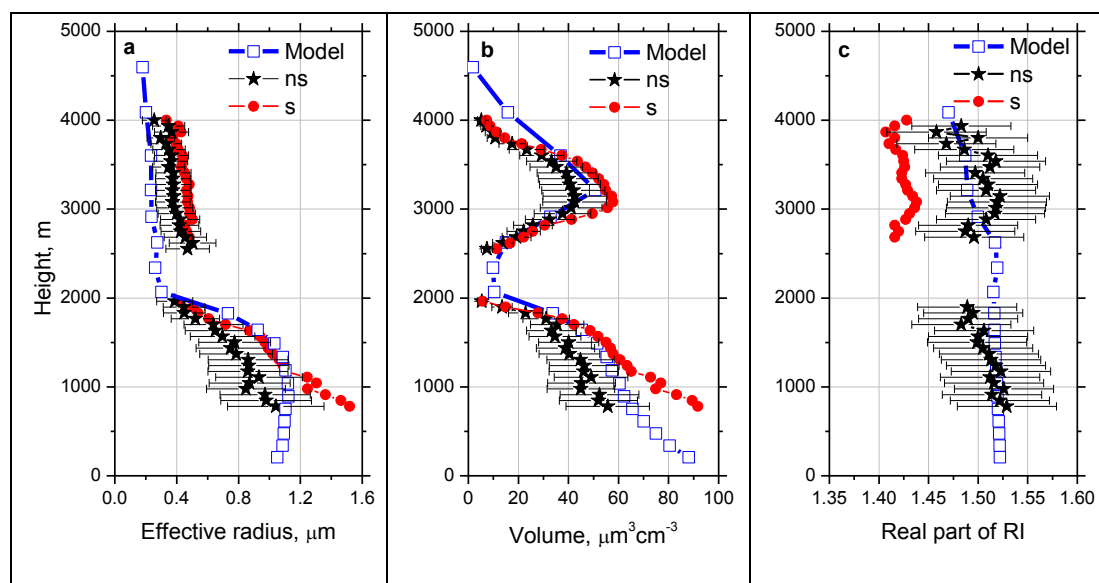

3

4 Fig.23. Profiles of (a) effective radius, (b) particle volume and (c) real part of the refractive index

5 derived from lidar measurements (solid symbols) and provided by MERRA-2 (open symbols).

6 Inversion of lidar measurements was performed in assumption of spherical particles (s) and using

7 the model of spheroids (ns).

8

9

10

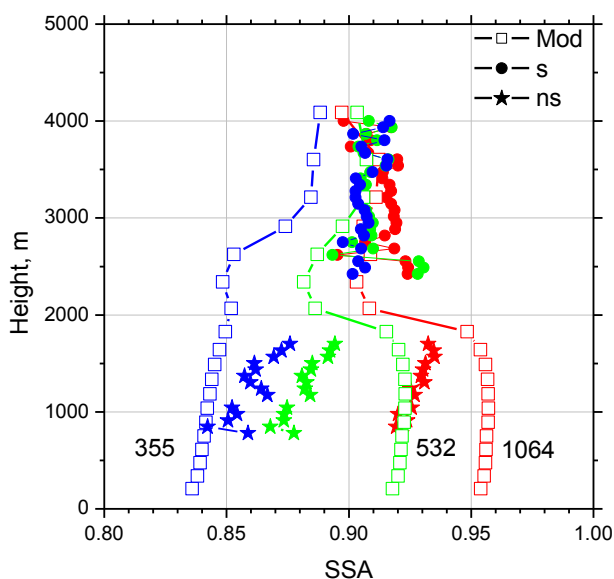

1

2 Fig.24. The single scattering albedo at 355 nm (blue), 532 nm (green) and 1064 nm (red) on 24  
3 December 2015 retrieved from  $3\beta+2\alpha$  lidar measurements (solid symbols) and provided by the  
4 MERRA-2 model (line + open symbols). For inversion of lidar data the spheroids (ns) were used  
5 below 2000 m and spheres (s) above 2000 m. Lidar measurements are averaged over 19:00-  
6 23:00 UTC interval 2015, while model data are shown for 21:00 UTC.

7

8
